# Supplementary material for: Ab initio and RRKM study of photodissociation of azulene cation
Source: Royal Society of Chemistry journal article supplement (doi:10.1039/b516437k), 2006-01-01
Supplement: b516437k.pdf [file b516437k.pdf]

**Bicyclobutane mechanism.**

TS1\_3

Sum of electronic and zero-point Energies= -385.324176

|   |           |           |           |
|---|-----------|-----------|-----------|
| C | 2.025566  | 1.105610  | -0.010306 |
| C | 0.705586  | 1.634923  | 0.194879  |
| C | -0.381991 | -0.646926 | 0.161104  |
| C | -0.394969 | 0.825642  | 0.198261  |
| C | -1.764205 | 1.219539  | -0.004806 |
| C | -2.548534 | 0.086289  | -0.236127 |
| C | 0.515294  | -1.615346 | 0.787635  |
| C | 1.251861  | -1.303906 | -0.373824 |
| C | -1.728110 | -1.046220 | -0.191520 |
| C | 2.232581  | -0.189221 | -0.341207 |
| H | 2.872078  | 1.783032  | 0.026090  |
| H | 0.580311  | 2.711728  | 0.274228  |
| H | -2.103797 | 2.248730  | -0.036621 |
| H | -3.609140 | 0.082638  | -0.453487 |
| H | 0.214216  | -2.597882 | 1.135536  |
| H | 1.375048  | -2.045049 | -1.167876 |
| H | -2.050898 | -2.072589 | -0.323417 |
| H | 3.243710  | -0.532918 | -0.558986 |

TS3\_4

Sum of electronic and zero-point Energies= -385.319931

|   |           |           |           |
|---|-----------|-----------|-----------|
| C | -2.133864 | 0.856136  | 0.019793  |
| C | -0.903286 | 1.585984  | 0.016929  |
| C | 0.278135  | -0.523975 | -0.384097 |
| C | 0.299561  | 0.915538  | -0.149188 |
| C | 1.672475  | 1.266546  | 0.033352  |
| C | 2.444746  | 0.114063  | 0.012339  |
| C | -0.009323 | -1.348596 | 0.885389  |
| C | -0.968268 | -1.343488 | -0.259063 |
| C | 1.620714  | -1.021338 | -0.272612 |
| C | -2.184226 | -0.506801 | -0.105915 |
| H | -3.059423 | 1.408027  | 0.147730  |
| H | -0.920727 | 2.660014  | 0.181040  |
| H | 2.040144  | 2.267912  | 0.225624  |
| H | 3.517368  | 0.067407  | 0.153345  |
| H | -0.023130 | -1.045560 | 1.926261  |
| H | -1.071310 | -2.274262 | -0.819215 |
| H | 1.956884  | -2.025878 | -0.498462 |
| H | -3.139786 | -1.022075 | -0.097884 |

TS4\_5

Sum of electronic and zero-point Energies= -385.329567

|   |           |           |           |
|---|-----------|-----------|-----------|
| C | -2.199127 | 0.727688  | 0.111120  |
| C | -1.044929 | 1.538590  | 0.014757  |
| C | 0.197915  | -0.485506 | -0.481168 |
| C | 0.183689  | 0.927833  | -0.211388 |
| C | 1.570174  | 1.340647  | -0.028965 |
| C | 2.367624  | 0.243291  | 0.020887  |
| C | 0.561015  | -1.298605 | 0.860791  |

|   |           |           |           |
|---|-----------|-----------|-----------|
| C | -0.947299 | -1.327595 | -0.313383 |
| C | 1.569355  | -1.013482 | -0.199569 |
| C | -2.165267 | -0.660518 | -0.009232 |
| H | -3.150681 | 1.208400  | 0.318492  |
| H | -1.119164 | 2.607938  | 0.187374  |
| H | 1.888943  | 2.363701  | 0.132017  |
| H | 3.433889  | 0.231473  | 0.210568  |
| H | 0.420211  | -0.901553 | 1.861623  |
| H | -0.942258 | -2.370715 | -0.616022 |
| H | 1.990907  | -1.856517 | -0.746966 |
| H | -3.080760 | -1.236787 | 0.069818  |

TS2\_5

Sum of electronic and zero-point Energies= -385.332236

|   |           |           |           |
|---|-----------|-----------|-----------|
| C | -2.357698 | 0.733909  | -0.070213 |
| C | -1.145309 | 1.434719  | 0.083798  |
| C | 0.013097  | -0.690921 | 0.141302  |
| C | 0.049935  | 0.737388  | 0.157686  |
| C | 1.390560  | 1.372100  | 0.127513  |
| C | 2.422004  | 0.577796  | -0.215182 |
| C | 1.283612  | -1.433041 | 0.562751  |
| C | -1.190020 | -1.384833 | -0.072292 |
| C | 1.985462  | -0.809042 | -0.480635 |
| C | -2.379885 | -0.658159 | -0.164113 |
| H | -3.286613 | 1.291840  | -0.138932 |
| H | -1.147566 | 2.520170  | 0.113965  |
| H | 1.503073  | 2.440066  | 0.285861  |
| H | 3.446815  | 0.898266  | -0.381617 |
| H | 1.568913  | -1.553758 | 1.605692  |
| H | -1.195453 | -2.469204 | -0.110613 |
| H | 1.999407  | -1.223991 | -1.492915 |
| H | -3.319132 | -1.182887 | -0.305128 |

1 ( azulene )

Sum of electronic and zero-point Energies= -385.436934

|   |           |           |          |
|---|-----------|-----------|----------|
| C | 2.294245  | -0.112931 | 0.000000 |
| C | 1.385533  | 0.959440  | 0.000000 |
| C | -0.855800 | -0.272227 | 0.000000 |
| C | 0.000000  | 0.897682  | 0.000000 |
| C | -0.882358 | 2.051752  | 0.000000 |
| C | -2.210260 | 1.616709  | 0.000000 |
| C | -0.494488 | -1.611373 | 0.000000 |
| C | 0.802917  | -2.152129 | 0.000000 |
| C | -2.222857 | 0.219423  | 0.000000 |
| C | 2.033653  | -1.487202 | 0.000000 |
| H | 3.344618  | 0.166933  | 0.000000 |
| H | 1.825390  | 1.954460  | 0.000000 |
| H | -0.543912 | 3.081538  | 0.000000 |
| H | -3.083961 | 2.255940  | 0.000000 |
| H | -1.309306 | -2.332241 | 0.000000 |
| H | 0.854658  | -3.237907 | 0.000000 |
| H | -3.102013 | -0.414637 | 0.000000 |

|                                            |           |           |          |             |
|--------------------------------------------|-----------|-----------|----------|-------------|
| H                                          | 2.911011  | -2.128948 | 0.000000 |             |
| 2 (naphthalene)                            |           |           |          |             |
| Sum of electronic and zero-point Energies= |           |           |          | -385.466068 |
| C                                          | -2.452344 | -0.696180 | 0.000000 |             |
| C                                          | -1.236113 | -1.402600 | 0.000000 |             |
| C                                          | 1.236113  | 1.402600  | 0.000000 |             |
| C                                          | 0.000000  | -0.716158 | 0.000000 |             |
| C                                          | 1.236111  | -1.402600 | 0.000000 |             |
| C                                          | 2.452343  | -0.696181 | 0.000000 |             |
| C                                          | 0.000000  | 0.716157  | 0.000000 |             |
| C                                          | -1.236111 | 1.402601  | 0.000000 |             |
| C                                          | 2.452344  | 0.696180  | 0.000000 |             |
| C                                          | -2.452343 | 0.696181  | 0.000000 |             |
| H                                          | -3.390234 | -1.242136 | 0.000000 |             |
| H                                          | -1.242970 | -2.489155 | 0.000000 |             |
| H                                          | 1.242966  | 2.489154  | 0.000000 |             |
| H                                          | 1.242966  | -2.489155 | 0.000000 |             |
| H                                          | 3.390233  | -1.242137 | 0.000000 |             |
| H                                          | -1.242969 | 2.489155  | 0.000000 |             |
| H                                          | 3.390235  | 1.242135  | 0.000000 |             |
| H                                          | -3.390233 | 1.242138  | 0.000000 |             |

|                                            |           |           |           |             |
|--------------------------------------------|-----------|-----------|-----------|-------------|
| 3                                          |           |           |           |             |
| Sum of electronic and zero-point Energies= |           |           |           | -385.330982 |
| C                                          | 2.066953  | 1.010099  | -0.054075 |             |
| C                                          | 0.792033  | 1.618097  | 0.165824  |             |
| C                                          | -0.324867 | -0.626368 | 0.032144  |             |
| C                                          | -0.356398 | 0.854629  | 0.170420  |             |
| C                                          | -1.703940 | 1.248180  | 0.056821  |             |
| C                                          | -2.509526 | 0.112195  | -0.199663 |             |
| C                                          | 0.460748  | -1.525156 | 0.940437  |             |
| C                                          | 1.034161  | -1.273983 | -0.378658 |             |
| C                                          | -1.701956 | -1.010015 | -0.275580 |             |
| C                                          | 2.175604  | -0.315215 | -0.354272 |             |
| H                                          | 2.957498  | 1.628714  | -0.023149 |             |
| H                                          | 0.729794  | 2.697797  | 0.278344  |             |
| H                                          | -2.062806 | 2.270275  | 0.119280  |             |
| H                                          | -3.582496 | 0.127401  | -0.344874 |             |
| H                                          | 0.170313  | -2.428015 | 1.463344  |             |
| H                                          | 1.068488  | -2.073927 | -1.118512 |             |
| H                                          | -2.033621 | -2.025184 | -0.463566 |             |
| H                                          | 3.155951  | -0.751840 | -0.531253 |             |

|                                            |           |           |           |             |
|--------------------------------------------|-----------|-----------|-----------|-------------|
| 4                                          |           |           |           |             |
| Sum of electronic and zero-point Energies= |           |           |           | -385.334574 |
| C                                          | -2.152569 | 0.761245  | 0.109892  |             |
| C                                          | -0.992750 | 1.564267  | -0.032570 |             |
| C                                          | 0.232628  | -0.454623 | -0.608057 |             |
| C                                          | 0.240682  | 0.938651  | -0.288988 |             |
| C                                          | 1.620956  | 1.299634  | 0.003006  |             |
| C                                          | 2.355107  | 0.158415  | 0.130399  |             |

|   |           |           |           |
|---|-----------|-----------|-----------|
| C | 0.299820  | -1.257071 | 0.774867  |
| C | -0.880632 | -1.352881 | -0.242525 |
| C | 1.510251  | -1.047293 | -0.158237 |
| C | -2.125630 | -0.622081 | 0.042655  |
| H | -3.094529 | 1.254175  | 0.330451  |
| H | -1.049693 | 2.633033  | 0.152066  |
| H | 1.968977  | 2.306597  | 0.200100  |
| H | 3.406428  | 0.105001  | 0.386373  |
| H | 0.198946  | -0.783733 | 1.746420  |
| H | -0.975875 | -2.322284 | -0.734239 |
| H | 1.944004  | -1.934981 | -0.617796 |
| H | -3.045440 | -1.187385 | 0.153978  |

5

Sum of electronic and zero-point Energies= -385.343445

|   |           |           |           |
|---|-----------|-----------|-----------|
| C | -2.311874 | 0.653030  | 0.044656  |
| C | -1.173009 | 1.461787  | 0.149627  |
| C | 0.158433  | -0.588603 | -0.059443 |
| C | 0.073616  | 0.857317  | 0.052052  |
| C | 1.405789  | 1.426399  | -0.065723 |
| C | 2.310041  | 0.449984  | -0.320644 |
| C | 1.218980  | -1.293521 | 0.936486  |
| C | -1.025229 | -1.379760 | -0.237054 |
| C | 1.652146  | -0.905427 | -0.373176 |
| C | -2.246871 | -0.745352 | -0.160254 |
| H | -3.290330 | 1.123062  | 0.096264  |
| H | -1.271055 | 2.537344  | 0.255934  |
| H | 1.629352  | 2.480469  | 0.051077  |
| H | 3.387493  | 0.562411  | -0.367679 |
| H | 1.410512  | -0.911115 | 1.934590  |
| H | -0.948813 | -2.455440 | -0.362634 |
| H | 1.875727  | -1.637483 | -1.147627 |
| H | -3.165022 | -1.314364 | -0.259084 |

### Norcaradiene-vinylidene mechanism

TS1\_6

Sum of electronic and zero-point Energies= -385.315265

|   |           |           |           |
|---|-----------|-----------|-----------|
| C | 2.500980  | -0.282711 | -0.118999 |
| C | 1.650038  | -1.207189 | 0.414743  |
| C | -1.617266 | 0.978046  | 0.637379  |
| C | 0.204225  | -0.945075 | 0.580408  |
| C | -0.690472 | -0.989287 | -0.610828 |
| C | -2.026940 | -0.877388 | -0.708603 |
| C | -0.241040 | 0.513601  | 0.361780  |
| C | 0.713786  | 1.392076  | -0.191795 |
| C | -2.578974 | 0.283801  | -0.016629 |
| C | 2.026450  | 1.011676  | -0.456380 |
| H | 3.551254  | -0.520589 | -0.254297 |
| H | 2.003339  | -2.186131 | 0.724822  |
| H | -1.791031 | 1.869053  | 1.232063  |
| H | -0.252012 | -1.472983 | 1.424763  |
| H | -2.639461 | -1.616375 | -1.220266 |

|   |           |          |           |
|---|-----------|----------|-----------|
| H | 0.413444  | 2.419462 | -0.376054 |
| H | -3.640754 | 0.502969 | 0.004557  |
| H | 2.710498  | 1.739295 | -0.882044 |

#### TS2\_6

Sum of electronic and zero-point Energies= -385.344795

|   |           |           |           |
|---|-----------|-----------|-----------|
| C | -2.481695 | -0.780760 | -0.058843 |
| C | -1.256886 | -1.407533 | -0.041257 |
| C | -0.021618 | 0.719674  | 0.030402  |
| C | 0.031383  | -0.756803 | 0.051034  |
| C | 2.452148  | -0.684593 | -0.055927 |
| C | 2.405949  | 0.742624  | -0.024314 |
| C | -1.279704 | 1.346523  | 0.005859  |
| C | -2.473787 | 0.629031  | -0.038666 |
| C | 1.211870  | 1.421694  | 0.021104  |
| C | 1.310354  | -1.432572 | -0.020413 |
| H | -3.408067 | -1.344787 | -0.109894 |
| H | -0.520571 | -1.138069 | 1.108994  |
| H | 3.415482  | -1.181058 | -0.114977 |
| H | 3.338523  | 1.297765  | -0.040965 |
| H | -1.314543 | 2.432266  | 0.006568  |
| H | -3.421164 | 1.159813  | -0.060902 |
| H | 1.191814  | 2.507382  | 0.035360  |
| H | 1.330445  | -2.517023 | -0.038067 |

#### 6

Sum of electronic and zero-point Energies= -385.354921

|   |           |           |           |
|---|-----------|-----------|-----------|
| C | -2.461511 | -0.822691 | -0.133935 |
| C | -1.267904 | -1.425922 | -0.024432 |
| C | -0.037773 | 0.730382  | 0.091491  |
| C | 0.013669  | -0.768460 | 0.251402  |
| C | 2.448715  | -0.681283 | -0.135361 |
| C | 2.381027  | 0.747466  | -0.084959 |
| C | -1.301437 | 1.355179  | 0.032321  |
| C | -2.464045 | 0.615836  | -0.087379 |
| C | 1.185973  | 1.429396  | 0.032229  |
| C | 1.321135  | -1.430384 | -0.024058 |
| H | -3.389573 | -1.370129 | -0.271255 |
| H | 3.411150  | -1.161432 | -0.279459 |
| H | 3.304725  | 1.313477  | -0.165851 |
| H | -1.349225 | 2.439877  | 0.019729  |
| H | -3.417429 | 1.131940  | -0.167513 |
| H | 1.172395  | 2.515307  | 0.016861  |
| H | 0.016334  | -0.850602 | 1.377491  |
| H | 1.344517  | -2.515551 | -0.033920 |

#### Cleavage of the 9,10-bond

##### TS1\_7

Sum of electronic and zero-point Energies= -385.266254

|   |           |           |           |
|---|-----------|-----------|-----------|
| C | -2.128633 | -1.013859 | -0.163315 |
| C | -0.850387 | -1.631401 | -0.424551 |
| C | 0.874189  | 1.349700  | -0.288248 |

|   |           |           |           |
|---|-----------|-----------|-----------|
| C | 0.352759  | -1.380771 | 0.077055  |
| C | 1.604948  | -1.304035 | 0.500747  |
| C | 2.553774  | -0.285031 | 0.093875  |
| C | -0.344820 | 1.477051  | 0.017666  |
| C | -1.704855 | 1.457999  | 0.261590  |
| C | 2.227514  | 0.989964  | -0.290308 |
| C | -2.475361 | 0.284049  | 0.200009  |
| H | -2.972193 | -1.677937 | -0.336449 |
| H | -0.894726 | -2.483261 | -1.110986 |
| H | 1.964615  | -2.054650 | 1.208489  |
| H | 3.609182  | -0.543048 | 0.131766  |
| H | -2.189221 | 2.393665  | 0.520415  |
| H | 2.978948  | 1.704907  | -0.605306 |
| H | -3.529441 | 0.443143  | 0.411969  |
| H | 0.378081  | 2.555183  | -0.127013 |

TS2\_7

Sum of electronic and zero-point Energies= -385.313370

|   |           |           |           |
|---|-----------|-----------|-----------|
| C | 2.438654  | 0.638507  | 0.224553  |
| C | 1.241686  | 1.417509  | 0.411169  |
| C | -1.227214 | -1.405744 | 0.461463  |
| C | 0.000105  | 1.121165  | 0.000108  |
| C | -1.241385 | 1.417918  | -0.410956 |
| C | -2.438302 | 0.638757  | -0.224990 |
| C | -0.000124 | -1.123119 | 0.000402  |
| C | 1.226756  | -1.405679 | -0.461362 |
| C | -2.434862 | -0.652418 | 0.209027  |
| C | 2.434790  | -0.652705 | -0.209239 |
| H | 3.379968  | 1.118438  | 0.473843  |
| H | 1.321476  | 2.327086  | 1.011310  |
| H | -1.316218 | -2.272668 | 1.122242  |
| H | -1.321147 | 2.328189  | -1.010022 |
| H | -3.379504 | 1.118713  | -0.474645 |
| H | 1.315111  | -2.271938 | -1.123128 |
| H | -3.376877 | -1.156199 | 0.402358  |
| H | 3.376565  | -1.156767 | -0.403008 |

7

Sum of electronic and zero-point Energies= -385.320044

|   |           |           |           |
|---|-----------|-----------|-----------|
| C | -2.365335 | 0.629127  | -0.260976 |
| C | -1.211316 | 1.462897  | -0.528462 |
| C | 1.211334  | -1.462946 | -0.528411 |
| C | -0.000149 | 1.375268  | -0.000056 |
| C | 1.210886  | 1.462838  | 0.528699  |
| C | 2.365139  | 0.629559  | 0.260793  |
| C | 0.000156  | -1.375169 | -0.000035 |
| C | -1.210857 | -1.462774 | 0.528703  |
| C | 2.365318  | -0.629215 | -0.260953 |
| C | -2.365179 | -0.629651 | 0.260702  |
| H | -3.323398 | 1.066801  | -0.528824 |
| H | -1.366629 | 2.282320  | -1.236140 |
| H | 1.366526  | -2.282202 | -1.236307 |

|   |           |           |           |
|---|-----------|-----------|-----------|
| H | 1.365976  | 2.282114  | 1.236604  |
| H | 3.323129  | 1.067561  | 0.528380  |
| H | -1.365829 | -2.281837 | 1.236889  |
| H | 3.323347  | -1.066733 | -0.529170 |
| H | -3.323110 | -1.067626 | 0.528540  |

### Methylene walk

TS1\_8

Sum of electronic and zero-point Energies= -385.305800

|   |           |           |           |
|---|-----------|-----------|-----------|
| C | 1.859894  | 1.263158  | -0.078846 |
| C | 0.515390  | 1.676854  | -0.028034 |
| C | -0.502599 | -0.742152 | 0.016307  |
| C | -0.597205 | 0.770320  | -0.001617 |
| C | -1.927367 | 1.096741  | -0.013724 |
| C | -2.695976 | -0.123209 | -0.010764 |
| C | 0.612091  | -1.544738 | 0.006014  |
| C | 1.998693  | -1.185046 | -0.010103 |
| C | -1.848342 | -1.212995 | 0.011401  |
| C | 2.583805  | 0.066629  | -0.026099 |
| H | 1.171053  | 1.694505  | 1.061440  |
| H | 0.316071  | 2.736782  | -0.199503 |
| H | -2.342865 | 2.097171  | -0.034548 |
| H | -3.778783 | -0.163614 | -0.029754 |
| H | 0.423156  | -2.615870 | 0.009247  |
| H | 2.691014  | -2.023905 | 0.002558  |
| H | -2.138675 | -2.255909 | 0.015356  |
| H | 3.668741  | 0.137465  | -0.012008 |

TS8\_10

Sum of electronic and zero-point Energies= -385.316187

|   |           |           |           |
|---|-----------|-----------|-----------|
| C | 1.600318  | 1.158066  | -0.182161 |
| C | 0.503900  | 1.778080  | 0.503989  |
| C | -0.422625 | -0.705294 | 0.284874  |
| C | -0.528374 | 0.714588  | 0.200404  |
| C | -1.847271 | 1.010850  | -0.276308 |
| C | -2.603656 | -0.186458 | -0.312573 |
| C | 0.723858  | -1.537484 | 0.298188  |
| C | 1.993551  | -1.173385 | -0.083182 |
| C | -1.770625 | -1.231615 | 0.042096  |
| C | 2.390326  | 0.172151  | -0.511412 |
| H | 0.737471  | 1.957811  | 1.562423  |
| H | 0.187282  | 2.727327  | 0.052519  |
| H | -2.219090 | 2.007473  | -0.487380 |
| H | -3.657421 | -0.255347 | -0.549630 |
| H | 0.563373  | -2.592140 | 0.508958  |
| H | 2.801575  | -1.897788 | -0.024536 |
| H | -2.029136 | -2.282675 | 0.091338  |
| H | 3.379529  | 0.338341  | -0.937176 |

TS1\_9

Sum of electronic and zero-point Energies= -385.311926

|   |           |           |           |
|---|-----------|-----------|-----------|
| C | -1.954868 | -1.239208 | -0.188914 |
|---|-----------|-----------|-----------|

|   |           |           |           |
|---|-----------|-----------|-----------|
| C | -0.583158 | -1.506735 | -0.175890 |
| C | 0.591874  | 0.715150  | -0.127260 |
| C | 0.564806  | -0.776913 | 0.019847  |
| C | 1.891023  | -1.196764 | 0.159942  |
| C | 2.741629  | -0.057269 | 0.071228  |
| C | -0.481624 | 1.563906  | -0.064777 |
| C | -1.875693 | 1.253375  | 0.139807  |
| C | 1.976755  | 1.082856  | -0.117194 |
| C | -2.536571 | 0.056184  | 0.131153  |
| H | 2.217675  | -2.224443 | 0.263684  |
| H | 3.821839  | -0.088061 | 0.144501  |
| H | -0.257521 | 2.627737  | -0.109520 |
| H | -2.501912 | 2.126256  | 0.308588  |
| H | 2.345045  | 2.100039  | -0.179267 |
| H | -3.608027 | 0.060623  | 0.310744  |
| H | -1.406118 | -1.967760 | 0.778462  |
| H | -2.616011 | -2.001882 | -0.604850 |

#### TS9\_10

Sum of electronic and zero-point Energies= -385.319063

|   |           |           |           |
|---|-----------|-----------|-----------|
| C | -2.355763 | -0.003109 | -0.209524 |
| C | -0.763615 | -1.294604 | -0.243886 |
| C | 0.608027  | 0.750316  | 0.062688  |
| C | 0.457040  | -0.683563 | -0.255834 |
| C | 1.750172  | -1.244014 | -0.280380 |
| C | 2.704181  | -0.218971 | 0.029560  |
| C | -0.436618 | 1.613689  | 0.123844  |
| C | -1.781563 | 1.227600  | -0.265734 |
| C | 2.048107  | 0.970033  | 0.239574  |
| C | -1.899892 | -1.237093 | 0.620415  |
| H | -3.264842 | -0.180783 | -0.776016 |
| H | 1.974330  | -2.291313 | -0.443435 |
| H | 3.775285  | -0.373213 | 0.063843  |
| H | -0.258225 | 2.663467  | 0.343379  |
| H | -2.374765 | 2.014167  | -0.730225 |
| H | 2.498604  | 1.935321  | 0.436987  |
| H | -1.688691 | -1.021221 | 1.675188  |
| H | -2.642157 | -2.028135 | 0.505936  |

#### TS10\_11

Sum of electronic and zero-point Energies= -385.332293

|   |           |           |           |
|---|-----------|-----------|-----------|
| C | 2.041400  | 0.714823  | 0.051835  |
| C | 0.712699  | 1.168232  | -0.188471 |
| C | -0.135952 | -1.085564 | -0.212903 |
| C | -0.271150 | 0.271762  | -0.568990 |
| C | -1.659297 | 0.728608  | -0.323139 |
| C | -2.318471 | -0.411245 | 0.224380  |
| C | 1.170615  | -1.576839 | -0.004909 |
| C | 2.256438  | -0.658002 | 0.047873  |
| C | -1.446949 | -1.503737 | 0.226414  |
| C | -0.227632 | 2.118260  | 0.405879  |
| H | 2.847133  | 1.409676  | 0.264894  |



|   |           |           |           |
|---|-----------|-----------|-----------|
| H | -2.200271 | 1.475239  | -0.894594 |
| H | -3.374799 | -0.462653 | 0.459664  |
| H | 1.354067  | -2.632463 | 0.173876  |
| H | 3.260106  | -1.043141 | 0.195605  |
| H | -1.709136 | -2.508003 | 0.542563  |
| H | -0.237804 | 2.240691  | 1.487943  |
| H | -0.669500 | 2.922866  | -0.177766 |

TS11\_12

Sum of electronic and zero-point Energies= -385.318404

|   |           |           |           |
|---|-----------|-----------|-----------|
| C | -2.149153 | -0.793134 | -0.037005 |
| C | -0.856581 | -1.260771 | -0.337929 |
| C | 0.093839  | 0.977699  | -0.181734 |
| C | 0.215645  | -0.408287 | -0.582983 |
| C | 1.611491  | -0.860597 | -0.318630 |
| C | 2.305946  | 0.410728  | 0.054990  |
| C | -1.177467 | 1.470334  | 0.060473  |
| C | -2.288458 | 0.582314  | 0.109444  |
| C | 1.441039  | 1.456057  | 0.087602  |
| C | 0.678146  | -1.528497 | 0.712576  |
| H | -2.999558 | -1.462719 | 0.037300  |
| H | 2.112506  | -1.566862 | -0.976710 |
| H | 3.370894  | 0.455984  | 0.248052  |
| H | -1.332766 | 2.522706  | 0.280704  |
| H | -3.275060 | 0.991458  | 0.309084  |
| H | 1.686086  | 2.475963  | 0.360255  |
| H | 0.557151  | -1.077145 | 1.692716  |
| H | 0.634064  | -2.614471 | 0.647775  |

TS12\_13

Sum of electronic and zero-point Energies= -385.321964

|   |           |           |           |
|---|-----------|-----------|-----------|
| C | -2.380668 | -0.827804 | -0.195056 |
| C | -1.108405 | -1.374472 | -0.142280 |
| C | -0.038848 | 0.753152  | 0.164808  |
| C | 0.041695  | -0.668886 | 0.097103  |
| C | 2.031798  | -0.697696 | -0.459314 |
| C | 2.312006  | 0.720014  | -0.253983 |
| C | -1.288825 | 1.346678  | 0.117222  |
| C | -2.455526 | 0.558995  | -0.048203 |
| C | 1.253508  | 1.466122  | 0.124840  |
| C | 1.363293  | -1.425490 | 0.578168  |
| H | -3.265747 | -1.430736 | -0.371753 |
| H | 2.245113  | -1.174965 | -1.417845 |
| H | 3.290044  | 1.122453  | -0.504895 |
| H | -1.380004 | 2.427055  | 0.175279  |
| H | -3.423681 | 1.049234  | -0.099920 |
| H | 1.311740  | 2.538981  | 0.276958  |
| H | 1.589261  | -1.137364 | 1.606381  |
| H | 1.253108  | -2.498339 | 0.435969  |

TS6\_13

Sum of electronic and zero-point Energies= -385.345674

|   |           |           |           |
|---|-----------|-----------|-----------|
| C | -2.465860 | -0.822671 | -0.058888 |
| C | -1.262303 | -1.426811 | -0.008164 |
| C | -0.052373 | 0.716594  | 0.033365  |
| C | -0.008778 | -0.753854 | 0.057386  |
| C | 2.467965  | -0.644133 | -0.065392 |
| C | 2.393192  | 0.757166  | -0.037905 |
| C | -1.323930 | 1.348924  | 0.016784  |
| C | -2.486605 | 0.613949  | -0.030983 |
| C | 1.168617  | 1.415976  | 0.011857  |
| C | 1.309122  | -1.416691 | -0.036955 |
| H | -3.394908 | -1.382176 | -0.123213 |
| H | 3.429263  | -1.142962 | -0.130143 |
| H | 3.310107  | 1.337419  | -0.060926 |
| H | -1.363628 | 2.433764  | 0.025346  |
| H | -3.447433 | 1.119802  | -0.053441 |
| H | 1.144029  | 2.502303  | 0.017475  |
| H | 0.561302  | -1.097290 | 1.105628  |
| H | 1.326980  | -2.501549 | -0.067357 |

8

Sum of electronic and zero-point Energies= -385.324426

|   |           |           |           |
|---|-----------|-----------|-----------|
| C | 1.908618  | 1.226365  | -0.035827 |
| C | 0.559646  | 1.744026  | 0.088664  |
| C | -0.507420 | -0.743243 | 0.042034  |
| C | -0.589315 | 0.779895  | 0.008220  |
| C | -1.903184 | 1.101956  | -0.055686 |
| C | -2.688359 | -0.134166 | -0.050706 |
| C | 0.604260  | -1.567518 | 0.049847  |
| C | 1.970161  | -1.218295 | -0.014269 |
| C | -1.847252 | -1.225070 | 0.019924  |
| C | 2.584211  | 0.056315  | -0.079315 |
| H | 0.528924  | 2.271901  | 1.063150  |
| H | 0.423669  | 2.561828  | -0.639517 |
| H | -2.326445 | 2.098293  | -0.094720 |
| H | -3.771000 | -0.170036 | -0.102465 |
| H | 0.401583  | -2.635327 | 0.080851  |
| H | 2.659163  | -2.061159 | -0.021859 |
| H | -2.134704 | -2.268211 | 0.028856  |
| H | 3.670608  | 0.081125  | -0.151606 |

9

Sum of electronic and zero-point Energies= -385.352467

|   |           |           |          |
|---|-----------|-----------|----------|
| C | -0.673646 | -2.284584 | 0.000000 |
| C | 0.563088  | -1.511790 | 0.000000 |
| C | 0.000000  | 0.931285  | 0.000000 |
| C | 0.938111  | -0.231323 | 0.000000 |
| C | 2.263360  | 0.322333  | 0.000000 |
| C | 2.175519  | 1.713056  | 0.000000 |
| C | -1.374983 | 0.908564  | 0.000000 |
| C | -2.267378 | -0.218341 | 0.000000 |
| C | 0.818070  | 2.087760  | 0.000000 |
| C | -1.988126 | -1.548640 | 0.000000 |

|   |           |           |           |
|---|-----------|-----------|-----------|
| H | 3.173806  | -0.265018 | 0.000000  |
| H | 3.015005  | 2.396910  | 0.000000  |
| H | -1.866184 | 1.880222  | 0.000000  |
| H | -3.321712 | 0.044198  | 0.000000  |
| H | 0.445777  | 3.106759  | 0.000000  |
| H | -2.842362 | -2.224027 | 0.000000  |
| H | -0.664212 | -2.974482 | 0.863000  |
| H | -0.664212 | -2.974482 | -0.863000 |

10

Sum of electronic and zero-point Energies= -385.414787

|   |           |           |          |
|---|-----------|-----------|----------|
| C | 1.757038  | -1.174315 | 0.000000 |
| C | 1.400754  | 0.241939  | 0.000000 |
| C | -0.971225 | -0.485864 | 0.000000 |
| C | 0.000000  | 0.563273  | 0.000000 |
| C | -0.716941 | 1.813435  | 0.000000 |
| C | -2.088792 | 1.543962  | 0.000000 |
| C | -0.587587 | -1.809507 | 0.000000 |
| C | 0.804373  | -2.151591 | 0.000000 |
| C | -2.279699 | 0.149584  | 0.000000 |
| C | 2.384655  | 1.197486  | 0.000000 |
| H | 2.811372  | -1.433762 | 0.000000 |
| H | -0.274202 | 2.802514  | 0.000000 |
| H | -2.875466 | 2.287306  | 0.000000 |
| H | -1.330372 | -2.603112 | 0.000000 |
| H | 1.090648  | -3.197736 | 0.000000 |
| H | -3.232825 | -0.366555 | 0.000000 |
| H | 2.160142  | 2.259827  | 0.000000 |
| H | 3.435247  | 0.921118  | 0.000000 |

11

Sum of electronic and zero-point Energies= -385.343952

|   |           |           |           |
|---|-----------|-----------|-----------|
| C | 1.818907  | 1.049157  | 0.172982  |
| C | 0.443564  | 1.221649  | -0.183408 |
| C | 0.080061  | -1.099486 | -0.331261 |
| C | -0.267426 | 0.189388  | -0.763948 |
| C | -1.651497 | 0.579270  | -0.350428 |
| C | -2.092676 | -0.675418 | 0.326979  |
| C | 1.477249  | -1.358518 | -0.071266 |
| C | 2.328903  | -0.261024 | 0.126487  |
| C | -1.114673 | -1.651602 | 0.265904  |
| C | -0.848967 | 1.816454  | 0.363746  |
| H | 2.440148  | 1.875113  | 0.506849  |
| H | -2.375230 | 0.951628  | -1.080072 |
| H | -3.086916 | -0.834533 | 0.732844  |
| H | 1.851286  | -2.372525 | 0.036651  |
| H | 3.378802  | -0.435882 | 0.338846  |
| H | -1.187898 | -2.640614 | 0.705488  |
| H | -0.885539 | 1.815340  | 1.456295  |
| H | -1.175323 | 2.782260  | -0.031617 |

12

Sum of electronic and zero-point Energies= -385.338470

|   |           |           |           |
|---|-----------|-----------|-----------|
| C | -2.256405 | -0.860791 | -0.220674 |
| C | -0.989723 | -1.348464 | -0.324172 |
| C | 0.007210  | 0.857756  | 0.079236  |
| C | 0.175500  | -0.584499 | -0.110919 |
| C | 1.668096  | -0.800051 | -0.436049 |
| C | 2.247515  | 0.583683  | -0.339253 |
| C | -1.273937 | 1.378172  | 0.208950  |
| C | -2.379422 | 0.525781  | 0.066522  |
| C | 1.304472  | 1.500648  | -0.022062 |
| C | 1.276685  | -1.344409 | 0.864888  |
| H | -3.138848 | -1.477610 | -0.358873 |
| H | 1.919423  | -1.474384 | -1.250439 |
| H | 3.315086  | 0.759287  | -0.413161 |
| H | -1.428623 | 2.440574  | 0.367958  |
| H | -3.379116 | 0.945820  | 0.148126  |
| H | 1.476582  | 2.554893  | 0.160704  |
| H | 1.472132  | -0.787027 | 1.776235  |
| H | 1.083425  | -2.408506 | 0.970641  |

13

Sum of electronic and zero-point Energies= -385.386909

|   |           |           |           |
|---|-----------|-----------|-----------|
| C | -2.554878 | -0.479249 | 0.000000  |
| C | -1.404012 | -1.234623 | 0.000000  |
| C | 0.000000  | 0.687779  | 0.000000  |
| C | -0.121123 | -0.748351 | 0.000000  |
| C | 2.399212  | -0.878979 | 0.000000  |
| C | 2.476775  | 0.487865  | 0.000000  |
| C | -1.167756 | 1.503689  | 0.000000  |
| C | -2.425038 | 0.931626  | 0.000000  |
| C | 1.288419  | 1.253226  | 0.000000  |
| C | 1.109366  | -1.600016 | 0.000000  |
| H | -3.538929 | -0.940912 | 0.000000  |
| H | 3.306119  | -1.478778 | 0.000000  |
| H | 3.437156  | 0.992144  | 0.000000  |
| H | -1.054776 | 2.583802  | 0.000000  |
| H | -3.315461 | 1.552349  | 0.000000  |
| H | 1.371542  | 2.338729  | 0.000000  |
| H | 1.094279  | -2.292569 | 0.861008  |
| H | 1.094279  | -2.292569 | -0.861008 |

### Hydrogen shift

TS1\_14

Sum of electronic and zero-point Energies= -385.303362

|   |           |           |           |
|---|-----------|-----------|-----------|
| C | 1.927244  | 1.220711  | -0.019483 |
| C | 0.575478  | 1.571956  | 0.043468  |
| C | -0.587718 | -0.775155 | 0.008406  |
| C | -0.565751 | 0.763793  | 0.054439  |
| C | -1.895840 | 1.141672  | 0.003044  |
| C | -2.723010 | -0.019869 | -0.059094 |

|   |           |           |           |
|---|-----------|-----------|-----------|
| C | 0.591265  | -1.535053 | -0.013701 |
| C | 1.961379  | -1.317185 | -0.035136 |
| C | -1.958180 | -1.175554 | -0.049153 |
| C | 2.541162  | -0.045619 | -0.061606 |
| H | 2.615841  | 2.060426  | -0.040495 |
| H | 0.371780  | 2.640994  | 0.061477  |
| H | -2.252042 | 2.164821  | -0.014222 |
| H | -3.804752 | 0.000855  | -0.124434 |
| H | -0.059950 | -1.423568 | 1.086861  |
| H | 2.612473  | -2.187448 | -0.013079 |
| H | -2.308007 | -2.198540 | -0.088332 |
| H | 3.628491  | -0.035722 | -0.094880 |

#### TS14\_15

Sum of electronic and zero-point Energies= -385.315870

|   |           |           |           |
|---|-----------|-----------|-----------|
| C | 2.089019  | 0.868553  | 0.144203  |
| C | 0.848106  | 1.534177  | 0.161916  |
| C | -0.576461 | -0.432598 | 0.923386  |
| C | -0.408917 | 0.898070  | 0.258892  |
| C | -1.594429 | 1.161210  | -0.475088 |
| C | -2.415214 | 0.025647  | -0.475292 |
| C | 0.099324  | -1.249954 | -0.040000 |
| C | 1.324827  | -1.469301 | -0.516093 |
| C | -1.856168 | -0.966383 | 0.354384  |
| C | 2.321220  | -0.468993 | -0.193214 |
| H | 2.970376  | 1.502362  | 0.186638  |
| H | 0.858068  | 2.605300  | -0.030857 |
| H | -0.329810 | -0.547161 | 1.983558  |
| H | -1.786775 | 2.069132  | -1.037490 |
| H | -3.334455 | -0.079012 | -1.039698 |
| H | 1.585121  | -2.294905 | -1.172471 |
| H | -2.303114 | -1.908295 | 0.645501  |
| H | 3.352752  | -0.749997 | -0.393742 |

#### TS2\_15

Sum of electronic and zero-point Energies= -385.313977

|   |           |           |           |
|---|-----------|-----------|-----------|
| C | 2.208322  | 0.734105  | 0.076597  |
| C | 1.039999  | 1.382841  | 0.373557  |
| C | -0.799027 | -0.418882 | 1.116655  |
| C | -0.259148 | 0.700441  | 0.239155  |
| C | -1.378062 | 1.161915  | -0.598234 |
| C | -2.372062 | 0.211490  | -0.573996 |
| C | -0.049513 | -0.870794 | -0.031951 |
| C | 1.142619  | -1.448386 | -0.444831 |
| C | -1.968967 | -0.828192 | 0.313749  |
| C | 2.265179  | -0.620407 | -0.388257 |
| H | 3.143921  | 1.278958  | 0.155213  |
| H | 1.046364  | 2.440766  | 0.620229  |
| H | -0.551493 | -0.665588 | 2.145586  |
| H | -1.334139 | 2.037751  | -1.235396 |
| H | -3.257979 | 0.187070  | -1.195800 |
| H | 1.204053  | -2.479775 | -0.778757 |

|   |           |           |           |
|---|-----------|-----------|-----------|
| H | -2.455291 | -1.785852 | 0.458967  |
| H | 3.228520  | -1.038119 | -0.664706 |

14

Sum of electronic and zero-point Energies= -385.339394

|   |           |           |           |
|---|-----------|-----------|-----------|
| C | 1.980988  | 1.154750  | 0.165708  |
| C | 0.632056  | 1.542509  | 0.047069  |
| C | -0.566023 | -0.748030 | 0.415983  |
| C | -0.503629 | 0.731648  | 0.048329  |
| C | -1.805569 | 1.135737  | -0.244947 |
| C | -2.702080 | 0.025893  | -0.183380 |
| C | 0.525845  | -1.534871 | -0.164868 |
| C | 1.844728  | -1.350798 | -0.308499 |
| C | -2.004839 | -1.097783 | 0.163112  |
| C | 2.517328  | -0.113482 | -0.016814 |
| H | 2.697676  | 1.963484  | 0.274965  |
| H | 0.454952  | 2.607169  | -0.099109 |
| H | -0.457643 | -0.843331 | 1.519768  |
| H | -2.100455 | 2.159220  | -0.456184 |
| H | -3.766483 | 0.078499  | -0.377882 |
| H | 2.460759  | -2.173919 | -0.667612 |
| H | -2.406072 | -2.095621 | 0.299383  |
| H | 3.604431  | -0.168946 | -0.023492 |

15

Sum of electronic and zero-point Energies= -385.332241

|   |           |           |           |
|---|-----------|-----------|-----------|
| C | 2.098110  | 0.712791  | 0.069584  |
| C | 0.963878  | 1.533036  | 0.156266  |
| C | -0.549035 | -0.220251 | 1.105494  |
| C | -0.348365 | 1.007346  | 0.315664  |
| C | -1.486122 | 1.213314  | -0.535885 |
| C | -2.214362 | 0.043875  | -0.574849 |
| C | -0.151614 | -1.202700 | 0.104395  |
| C | 1.001808  | -1.509648 | -0.516122 |
| C | -1.638498 | -0.965706 | 0.356649  |
| C | 2.134990  | -0.658239 | -0.270305 |
| H | 3.054351  | 1.227567  | 0.026607  |
| H | 1.088052  | 2.594668  | -0.049000 |
| H | -0.297786 | -0.328368 | 2.157956  |
| H | -1.634809 | 2.067431  | -1.187067 |
| H | -3.039531 | -0.154731 | -1.250697 |
| H | 1.094783  | -2.330607 | -1.221996 |
| H | -2.240143 | -1.748845 | 0.807910  |
| H | 3.110342  | -1.050018 | -0.549069 |

### Spiro-radical mechanism

TS1\_16

Sum of electronic and zero-point Energies= -385.301460

|   |           |          |           |
|---|-----------|----------|-----------|
| C | -0.238283 | 0.304937 | -0.193541 |
| C | 0.740672  | 1.355706 | 0.148830  |
| C | 2.058596  | 1.051867 | 0.312718  |

|   |           |           |           |
|---|-----------|-----------|-----------|
| C | 2.521331  | -0.279812 | 0.082863  |
| C | 1.675720  | -1.306078 | -0.321141 |
| C | 0.318106  | -1.033042 | -0.509000 |
| C | -0.863906 | -0.387355 | 1.058937  |
| C | -2.203689 | -0.481589 | 0.938615  |
| C | -2.587560 | 0.150593  | -0.325216 |
| C | -1.498391 | 0.622320  | -0.976542 |
| H | 0.366624  | 2.363317  | 0.303146  |
| H | 2.771326  | 1.820738  | 0.591977  |
| H | 3.581066  | -0.487954 | 0.207140  |
| H | 2.066902  | -2.296085 | -0.529906 |
| H | -0.359629 | -1.781041 | -0.907417 |
| H | -2.886678 | -0.902872 | 1.667982  |
| H | -3.611661 | 0.210697  | -0.677476 |
| H | -1.463522 | 1.087922  | -1.954577 |

#### TS16\_17

Sum of electronic and zero-point Energies= -385.302215

|   |           |           |           |
|---|-----------|-----------|-----------|
| C | 0.218130  | 0.537576  | -0.389475 |
| C | -0.144465 | -0.869697 | -0.618675 |
| C | -1.533512 | -1.246795 | -0.459220 |
| C | -2.429917 | -0.353394 | 0.064377  |
| C | -2.036769 | 0.981437  | 0.389061  |
| C | -0.759224 | 1.432318  | 0.151083  |
| C | 0.714448  | -0.750565 | 0.810220  |
| C | 2.072221  | -0.554494 | 0.824930  |
| C | 2.606634  | 0.247010  | -0.270848 |
| C | 1.569469  | 0.879904  | -0.832276 |
| H | 0.463523  | -1.447869 | -1.312100 |
| H | -1.849893 | -2.229561 | -0.793929 |
| H | -3.470011 | -0.638519 | 0.189554  |
| H | -2.778557 | 1.668394  | 0.784808  |
| H | -0.476322 | 2.461511  | 0.344460  |
| H | 0.115232  | -1.024816 | 1.669672  |
| H | 2.682236  | -0.908140 | 1.653732  |
| H | 3.651703  | 0.299198  | -0.551248 |

#### TS6\_17

Sum of electronic and zero-point Energies= -385.339696

|   |           |           |           |
|---|-----------|-----------|-----------|
| C | 2.484729  | 0.609140  | -0.045957 |
| C | 1.330145  | 1.344447  | -0.000507 |
| C | -1.299242 | -1.439171 | -0.004155 |
| C | 0.035070  | 0.711506  | 0.043193  |
| C | -1.219671 | 1.417462  | -0.007375 |
| C | -2.405429 | 0.735188  | -0.047424 |
| C | -0.013479 | -0.789488 | 0.048181  |
| C | 1.252018  | -1.430297 | -0.009781 |
| C | -2.445492 | -0.693487 | -0.045177 |
| C | 2.458364  | -0.829455 | -0.050294 |
| H | 3.445684  | 1.114132  | -0.079280 |
| H | 1.362241  | 2.429227  | -0.012955 |
| H | -1.320352 | -2.523289 | -0.023173 |

|   |           |           |           |
|---|-----------|-----------|-----------|
| H | 0.003861  | -0.038581 | 1.121133  |
| H | -1.193571 | 2.502525  | -0.029718 |
| H | -3.338701 | 1.287868  | -0.088426 |
| H | -3.407853 | -1.193879 | -0.084282 |
| H | 3.386624  | -1.393072 | -0.087518 |

16

Sum of electronic and zero-point Energies= -385.304766

|   |           |           |           |
|---|-----------|-----------|-----------|
| C | -0.233628 | -0.000430 | -0.200698 |
| C | 0.545941  | 1.252576  | -0.160819 |
| C | 1.910064  | 1.240399  | -0.004102 |
| C | 2.581759  | 0.000528  | 0.067179  |
| C | 1.910947  | -1.239762 | -0.004553 |
| C | 0.546815  | -1.252886 | -0.161421 |
| C | -1.097670 | -0.000778 | 1.136315  |
| C | -2.402650 | -0.000252 | 0.805456  |
| C | -2.590596 | 0.000525  | -0.656841 |
| C | -1.372478 | -0.000005 | -1.201119 |
| H | -0.009889 | 2.183507  | -0.228921 |
| H | 2.473878  | 2.165576  | 0.049136  |
| H | 3.663585  | 0.000934  | 0.180035  |
| H | 2.475362  | -2.164593 | 0.048305  |
| H | -0.008276 | -2.184185 | -0.229976 |
| H | -0.622965 | -0.001412 | 2.108240  |
| H | -3.216780 | -0.000384 | 1.524314  |
| H | -3.545943 | 0.001069  | -1.167522 |

17

Sum of electronic and zero-point Energies= -385.354222

|   |           |           |           |
|---|-----------|-----------|-----------|
| C | 2.490701  | 0.599678  | -0.133045 |
| C | 1.352215  | 1.336358  | -0.023887 |
| C | -1.271580 | -1.451225 | 0.027316  |
| C | 0.034405  | 0.687960  | 0.238443  |
| C | -1.239528 | 1.411852  | -0.019221 |
| C | -2.410106 | 0.728442  | -0.128688 |
| C | -0.016975 | -0.810877 | 0.089941  |
| C | 1.221787  | -1.441414 | 0.042884  |
| C | -2.426037 | -0.700971 | -0.085665 |
| C | 2.434505  | -0.838589 | -0.084242 |
| H | 3.451278  | 1.086552  | -0.270595 |
| H | 1.384729  | 2.422212  | -0.029890 |
| H | -1.309571 | -2.535280 | 0.011813  |
| H | 0.043791  | 0.766240  | 1.366890  |
| H | -1.213963 | 2.498224  | -0.028472 |
| H | -3.343694 | 1.264410  | -0.265677 |
| H | -3.381015 | -1.212410 | -0.166365 |
| H | 3.352117  | -1.417234 | -0.160723 |

**C<sub>2</sub>H<sub>2</sub> elimination (Azulene)**



## TS1\_18

Sum of electronic and zero-point Energies= -385.321790

|   |           |           |           |
|---|-----------|-----------|-----------|
| C | 1.666138  | 1.312479  | 0.212969  |
| C | 0.472032  | 1.778402  | -0.283695 |
| C | -0.205481 | -0.640119 | -0.088546 |
| C | -0.531831 | 0.782817  | -0.271676 |
| C | -1.958351 | 0.935172  | -0.149508 |
| C | -2.512519 | -0.301746 | 0.197307  |
| C | 0.902704  | -1.481703 | -0.623200 |
| C | 2.066165  | -1.081438 | -0.088705 |
| C | -1.490983 | -1.254271 | 0.270802  |
| C | 1.547481  | -0.008813 | 0.792072  |
| H | 2.636801  | 1.768360  | 0.022358  |
| H | 0.317643  | 2.775185  | -0.685784 |
| H | -2.486602 | 1.878435  | -0.224949 |
| H | -3.561978 | -0.489954 | 0.387992  |
| H | 0.715896  | -2.323562 | -1.286559 |
| H | 3.093562  | -1.350941 | -0.306045 |
| H | -1.618336 | -2.308085 | 0.490448  |
| H | 1.170882  | -0.194119 | 1.795624  |

## TS18\_19

Sum of electronic and zero-point Energies= -385.299721

|   |           |           |           |
|---|-----------|-----------|-----------|
| C | -1.859236 | 0.876148  | -0.578751 |
| C | -0.919718 | 1.606582  | 0.052286  |
| C | 0.110419  | -0.476060 | -0.432835 |
| C | 0.258337  | 0.753829  | 0.297182  |
| C | 1.699204  | 0.975733  | 0.429763  |
| C | 2.359944  | -0.052650 | -0.254716 |
| C | -0.232815 | -0.808819 | 1.194067  |
| C | -1.424260 | -1.245120 | 0.722549  |
| C | 1.437302  | -0.945852 | -0.823853 |
| C | -1.417590 | -0.574862 | -0.670002 |
| H | -2.846139 | 1.210382  | -0.876619 |
| H | -0.988984 | 2.644420  | 0.352788  |
| H | 2.163917  | 1.793923  | 0.966050  |
| H | 3.436035  | -0.171456 | -0.305768 |
| H | 0.420653  | -1.085644 | 2.011426  |
| H | -2.096925 | -2.012749 | 1.096437  |
| H | 1.660700  | -1.848126 | -1.379386 |
| H | -1.818779 | -1.184321 | -1.479055 |

## TS1\_20

Sum of electronic and zero-point Energies= -385.308427

|   |           |           |           |
|---|-----------|-----------|-----------|
| C | -2.083143 | 0.950771  | -0.234092 |
| C | -0.689573 | 0.835724  | 0.186514  |
| C | -0.440039 | -0.546418 | 0.452563  |
| C | 0.453815  | 1.612500  | 0.088388  |
| C | 1.752178  | 1.000924  | 0.105543  |
| C | -1.605429 | -1.283408 | 0.032621  |
| C | -2.599330 | -0.352706 | -0.314760 |
| C | 0.912953  | -0.816590 | 0.798493  |

|   |           |           |           |
|---|-----------|-----------|-----------|
| C | 2.306820  | -0.150042 | -0.677175 |
| C | 1.769769  | -1.320062 | -0.302025 |
| H | -2.603022 | 1.867769  | -0.482984 |
| H | 0.401708  | 2.699562  | 0.041262  |
| H | 2.533982  | 1.671726  | 0.475922  |
| H | -1.714203 | -2.360686 | 0.053411  |
| H | -3.613613 | -0.606236 | -0.596775 |
| H | 1.333460  | -0.549021 | 1.766550  |
| H | 3.132917  | 0.014063  | -1.367766 |
| H | 1.860643  | -2.321344 | -0.706042 |

TS20\_21

Sum of electronic and zero-point Energies= -385.307155

|   |           |           |           |
|---|-----------|-----------|-----------|
| C | -1.486405 | 0.465733  | -0.691306 |
| C | -2.468563 | -0.907465 | 0.992385  |
| C | 0.729086  | 0.793931  | 0.010297  |
| C | 0.578517  | -0.625156 | -0.348256 |
| C | 1.836476  | -1.251681 | -0.128550 |
| C | 2.729888  | -0.261847 | 0.333871  |
| C | -0.447235 | 1.447198  | -0.190286 |
| C | -2.595249 | 0.208723  | 0.327193  |
| C | 2.083127  | 0.983749  | 0.424909  |
| C | -0.698531 | -0.850648 | -0.781673 |
| H | -1.914493 | 0.778472  | -1.654621 |
| H | -2.854993 | -1.630209 | 1.694707  |
| H | 2.079645  | -2.297068 | -0.278577 |
| H | 3.769870  | -0.437696 | 0.581617  |
| H | -0.661817 | 2.494830  | -0.004863 |
| H | -3.418635 | 0.917486  | 0.449418  |
| H | 2.544434  | 1.912632  | 0.738826  |
| H | -1.110677 | -1.753672 | -1.218009 |

TS19\_21

Sum of electronic and zero-point Energies= -385.275789

|   |           |           |           |
|---|-----------|-----------|-----------|
| C | -1.543317 | 0.950713  | -0.839012 |
| C | -0.589390 | 1.659557  | -0.129754 |
| C | 0.246602  | -0.484547 | -0.611923 |
| C | 0.462632  | 0.769780  | 0.200418  |
| C | 1.816642  | 0.779548  | 0.629259  |
| C | 2.404225  | -0.323849 | 0.021570  |
| C | -1.135843 | -0.587125 | 1.640964  |
| C | -1.728665 | -1.053325 | 0.580553  |
| C | 1.430688  | -1.109245 | -0.761373 |
| C | -1.243057 | -0.531599 | -0.814291 |
| H | -2.439741 | 1.374104  | -1.281518 |
| H | -0.636712 | 2.716634  | 0.105262  |
| H | 2.323657  | 1.545798  | 1.199895  |
| H | 3.458882  | -0.573456 | 0.086796  |
| H | -0.939366 | -0.512717 | 2.697050  |
| H | -2.500317 | -1.825958 | 0.621399  |
| H | 1.659242  | -2.025075 | -1.290470 |
| H | -1.648749 | -1.118783 | -1.636870 |

TS21\_P1

Sum of electronic and zero-point Energies= -385.285264

|   |           |           |           |
|---|-----------|-----------|-----------|
| C | -2.031622 | 0.997886  | -0.528095 |
| C | -0.752947 | 0.795478  | -0.014843 |
| C | -0.655314 | -0.619389 | 0.400978  |
| C | 0.447347  | 1.442255  | 0.306875  |
| C | 1.329429  | 0.466377  | 0.859905  |
| C | -1.925848 | -1.239310 | 0.099870  |
| C | -2.735152 | -0.259432 | -0.456828 |
| C | 0.566192  | -0.832945 | 0.941910  |
| H | -2.451200 | 1.921612  | -0.909674 |
| H | 0.685089  | 2.490690  | 0.171204  |
| H | 2.087260  | 0.712397  | 1.598338  |
| H | -2.203866 | -2.271121 | 0.275670  |
| H | -3.755395 | -0.406062 | -0.790960 |
| H | 0.970648  | -1.739826 | 1.376660  |
| C | 2.796260  | 0.198696  | -0.544011 |
| C | 2.754990  | -0.934666 | -1.038696 |
| H | 3.321692  | 1.136802  | -0.500404 |
| H | 2.585763  | -1.934187 | -1.383225 |

18

Sum of electronic and zero-point Energies= -385.344792

|   |           |           |           |
|---|-----------|-----------|-----------|
| C | 1.521608  | 1.303646  | 0.410731  |
| C | 0.425217  | 1.835096  | -0.236814 |
| C | -0.031177 | -0.500336 | 0.089931  |
| C | -0.569002 | 0.833983  | -0.332630 |
| C | -1.976383 | 0.786200  | -0.356902 |
| C | -2.374310 | -0.451262 | 0.209021  |
| C | 0.828671  | -1.339422 | -0.897081 |
| C | 1.992295  | -1.077992 | -0.301323 |
| C | -1.255187 | -1.188894 | 0.592382  |
| C | 1.360523  | -0.152313 | 0.749474  |
| H | 2.425953  | 1.860935  | 0.640298  |
| H | 0.320695  | 2.868226  | -0.549252 |
| H | -2.644967 | 1.588920  | -0.647377 |
| H | -3.403561 | -0.757652 | 0.358761  |
| H | 0.505338  | -1.937490 | -1.742281 |
| H | 3.024157  | -1.350151 | -0.488904 |
| H | -1.270829 | -2.166412 | 1.061948  |
| H | 1.509685  | -0.398605 | 1.806078  |

19

Sum of electronic and zero-point Energies= -385.325640

|   |           |           |           |
|---|-----------|-----------|-----------|
| C | 1.564937  | 0.060924  | -1.258703 |
| C | 0.671859  | -0.951054 | -1.221746 |
| C | -0.150895 | 0.785041  | -0.028221 |
| C | -0.208589 | -0.724392 | 0.021452  |
| C | -1.680810 | -0.987570 | 0.027727  |
| C | -2.348666 | 0.233812  | -0.010349 |
| C | 0.661817  | -0.862224 | 1.285281  |

|   |           |           |           |
|---|-----------|-----------|-----------|
| C | 1.554562  | 0.150711  | 1.258398  |
| C | -1.433063 | 1.327889  | -0.044006 |
| C | 1.335430  | 0.971141  | -0.032071 |
| H | 2.315526  | 0.246694  | -2.018952 |
| H | 0.562316  | -1.770040 | -1.922492 |
| H | -2.155008 | -1.962121 | 0.056612  |
| H | -3.427475 | 0.348495  | -0.014035 |
| H | 0.545017  | -1.628429 | 2.042344  |
| H | 2.296395  | 0.392267  | 2.011567  |
| H | -1.700822 | 2.377446  | -0.076033 |
| H | 1.764570  | 1.970020  | -0.065578 |

20

Sum of electronic and zero-point Energies= -385.349147

|   |           |           |           |
|---|-----------|-----------|-----------|
| C | -2.425279 | 0.090132  | -0.649157 |
| C | -0.979247 | -0.774457 | 0.645484  |
| C | 0.691541  | 0.839187  | 0.039464  |
| C | 0.444917  | -0.559895 | 0.320667  |
| C | 1.658920  | -1.274973 | 0.129874  |
| C | 2.644864  | -0.343031 | -0.239664 |
| C | -0.460323 | 1.563196  | 0.139983  |
| C | -1.600416 | 0.670048  | 0.520954  |
| C | 2.090979  | 0.961190  | -0.308479 |
| C | -1.893296 | -1.128514 | -0.557921 |
| H | -3.186708 | 0.547801  | -1.270695 |
| H | -1.178027 | -1.340396 | 1.561839  |
| H | 1.807819  | -2.341696 | 0.244973  |
| H | 3.681544  | -0.582654 | -0.445900 |
| H | -0.571010 | 2.624182  | -0.066922 |
| H | -2.192609 | 1.039762  | 1.366227  |
| H | 2.628395  | 1.867415  | -0.560821 |
| H | -2.025359 | -2.071716 | -1.075922 |

21

Sum of electronic and zero-point Energies= -385.307073

|   |           |           |           |
|---|-----------|-----------|-----------|
| C | 2.064182  | 1.033432  | 0.418059  |
| C | 0.733003  | 0.776959  | -0.016277 |
| C | 0.643559  | -0.659249 | -0.323367 |
| C | -0.464510 | 1.372380  | -0.270537 |
| C | -1.454771 | 0.322271  | -0.750937 |
| C | 1.924182  | -1.226361 | -0.059797 |
| C | 2.766969  | -0.188298 | 0.382022  |
| C | -0.611607 | -0.951749 | -0.758375 |
| H | 2.480555  | 1.988455  | 0.717554  |
| H | -0.726662 | 2.417637  | -0.141252 |
| H | -1.824388 | 0.560176  | -1.759754 |
| H | 2.212848  | -2.265254 | -0.171355 |
| H | 3.807414  | -0.311121 | 0.657783  |
| H | -1.003934 | -1.910711 | -1.079517 |
| C | -2.644772 | 0.192221  | 0.197688  |
| C | -2.653969 | -0.710967 | 1.148512  |
| H | -3.483602 | 0.878658  | 0.042836  |

H -3.275824 -1.121671 1.931767

### C<sub>2</sub>H<sub>2</sub> elimination (Naphthalene)

TS2\_22

Sum of electronic and zero-point Energies= -385.313245

|   |           |           |           |
|---|-----------|-----------|-----------|
| C | -0.982956 | 1.618016  | 0.139545  |
| C | -0.269003 | -0.541205 | -0.083814 |
| C | 0.121277  | 0.886667  | -0.277124 |
| C | 1.486666  | 1.267562  | -0.358593 |
| C | 2.450298  | 0.311877  | -0.100216 |
| C | 0.775422  | -1.434013 | 0.308510  |
| C | 2.092677  | -1.013184 | 0.280882  |
| C | -1.679975 | 0.468797  | 0.771816  |
| C | -1.562311 | -1.088784 | -0.679328 |
| C | -2.537439 | -0.386704 | -0.109002 |
| H | -1.230640 | 2.672698  | 0.119951  |
| H | 1.749403  | 2.308323  | -0.523614 |
| H | 3.501393  | 0.580797  | -0.143136 |
| H | 0.543337  | -2.477221 | 0.503241  |
| H | 2.883415  | -1.721462 | 0.509170  |
| H | -1.616845 | 0.323353  | 1.850743  |
| H | -1.587379 | -1.883497 | -1.419150 |
| H | -3.610628 | -0.337163 | -0.253267 |

TS22\_24

Sum of electronic and zero-point Energies= -385.291331

|   |           |           |           |
|---|-----------|-----------|-----------|
| C | 0.962754  | 1.615704  | -0.284070 |
| C | 0.208064  | -0.278375 | -0.409995 |
| C | -0.245143 | 1.011987  | 0.045584  |
| C | -1.579071 | 1.237430  | 0.468076  |
| C | -2.427856 | 0.150869  | 0.330554  |
| C | -0.681702 | -1.331586 | -0.635411 |
| C | -1.995865 | -1.092920 | -0.216029 |
| C | 1.616262  | 0.306378  | -0.726774 |
| C | 1.686421  | -1.106804 | 1.045378  |
| C | 2.483496  | -0.363688 | 0.328144  |
| H | 1.336310  | 2.635469  | -0.255266 |
| H | -1.926737 | 2.193366  | 0.845556  |
| H | -3.469301 | 0.245230  | 0.622065  |
| H | -0.388970 | -2.280428 | -1.073403 |
| H | -2.731011 | -1.885853 | -0.319980 |
| H | 2.009602  | 0.259606  | -1.746368 |
| H | 1.448114  | -1.833185 | 1.806276  |
| H | 3.557833  | -0.228176 | 0.448375  |

TS2\_23

Sum of electronic and zero-point Energies= -385.329329

|   |           |           |           |
|---|-----------|-----------|-----------|
| C | -1.317683 | 0.998894  | 0.473975  |
| C | -2.464559 | 0.667612  | -0.431598 |
| C | 0.083354  | -0.704389 | 0.080137  |

|   |           |           |           |
|---|-----------|-----------|-----------|
| C | 0.083341  | 0.704368  | 0.080121  |
| C | 1.261145  | 1.440607  | 0.012584  |
| C | 2.436457  | 0.706305  | -0.176666 |
| C | 1.261144  | -1.440622 | 0.012571  |
| C | -2.464530 | -0.667714 | -0.431573 |
| C | 2.436456  | -0.706308 | -0.176685 |
| C | -1.317675 | -0.998799 | 0.474106  |
| H | -1.502536 | 1.631644  | 1.345178  |
| H | -3.142866 | 1.390105  | -0.876032 |
| H | 1.274399  | 2.523526  | 0.082827  |
| H | 3.378584  | 1.230632  | -0.303051 |
| H | 1.274412  | -2.523540 | 0.082832  |
| H | -3.142721 | -1.390277 | -0.876064 |
| H | 3.378582  | -1.230632 | -0.303095 |
| H | -1.502549 | -1.631178 | 1.345571  |

#### TS24\_P2

Sum of electronic and zero-point Energies= -385.277340

|   |           |           |           |
|---|-----------|-----------|-----------|
| C | -0.800152 | 1.646334  | 0.270718  |
| C | -0.020266 | -0.228729 | 0.513895  |
| C | 0.449487  | 1.003699  | -0.044520 |
| C | 1.746403  | 1.158366  | -0.532030 |
| C | 2.545520  | 0.010314  | -0.446658 |
| C | 0.761524  | -1.348576 | 0.620871  |
| C | 2.076145  | -1.198345 | 0.110139  |
| C | -1.344414 | 0.438811  | 0.820348  |
| H | -1.193610 | 2.651171  | 0.163790  |
| H | 2.125491  | 2.088811  | -0.940937 |
| H | 3.566662  | 0.046784  | -0.813319 |
| H | 0.434499  | -2.283492 | 1.064303  |
| H | 2.754917  | -2.044762 | 0.153452  |
| H | -1.977546 | 0.315929  | 1.694482  |
| C | -2.542938 | -1.215757 | -0.898022 |
| C | -2.867410 | -0.144518 | -0.382637 |
| H | -2.124862 | -2.124541 | -1.280714 |
| H | -3.608933 | 0.620507  | -0.233686 |

#### TS17\_25

Sum of electronic and zero-point Energies= -385.291457

|   |           |           |           |
|---|-----------|-----------|-----------|
| C | 2.535426  | 0.488700  | -0.582246 |
| C | 1.572059  | 1.359561  | -0.704186 |
| C | -1.111098 | -1.411258 | -0.304234 |
| C | -0.266164 | 0.634814  | 0.827364  |
| C | -1.473336 | 1.282763  | 0.524899  |
| C | -2.471312 | 0.594794  | -0.159529 |
| C | -0.078177 | -0.729896 | 0.397545  |
| C | 1.228958  | -1.153880 | 0.483676  |
| C | -2.293968 | -0.747870 | -0.566757 |
| C | 2.452181  | -0.747375 | 0.286946  |
| H | 3.481477  | 0.649831  | -1.107335 |
| H | 1.243319  | 2.310338  | -1.089434 |
| H | -0.950103 | -2.432366 | -0.633175 |

|   |           |           |           |
|---|-----------|-----------|-----------|
| H | 0.440794  | 1.081268  | 1.519892  |
| H | -1.639227 | 2.301736  | 0.860645  |
| H | -3.414410 | 1.090324  | -0.370555 |
| H | -3.092517 | -1.254466 | -1.099285 |
| H | 3.363263  | -1.168774 | 0.698381  |

TS25\_P3a

Sum of electronic and zero-point Energies= -385.290541

|   |           |           |           |
|---|-----------|-----------|-----------|
| C | -3.403332 | -0.454038 | -0.748123 |
| C | -3.762416 | 0.711290  | -0.842524 |
| C | 0.987303  | 1.204730  | 0.305021  |
| C | 1.096970  | -1.252653 | 0.031762  |
| C | 2.414845  | -1.138009 | -0.364491 |
| C | 3.020800  | 0.130695  | -0.427290 |
| C | 0.358304  | -0.077069 | 0.371680  |
| C | -0.959976 | -0.180384 | 0.791165  |
| C | 2.306696  | 1.296160  | -0.092439 |
| C | -2.156363 | -0.273438 | 1.109836  |
| H | -3.290633 | -1.505410 | -0.920698 |
| H | -4.023167 | 1.749863  | -0.845003 |
| H | 0.418372  | 2.089084  | 0.571395  |
| H | 0.612217  | -2.221129 | 0.094476  |
| H | 2.984995  | -2.023844 | -0.624265 |
| H | 4.058371  | 0.211416  | -0.737903 |
| H | 2.794054  | 2.264063  | -0.146107 |
| H | -2.971208 | -0.367755 | 1.800523  |

22

Sum of electronic and zero-point Energies= -385.315259

|   |           |           |           |
|---|-----------|-----------|-----------|
| C | -0.953180 | 1.594388  | 0.322237  |
| C | -0.339392 | -0.451313 | 0.021213  |
| C | 0.148136  | 0.953263  | -0.226919 |
| C | 1.505070  | 1.263544  | -0.424531 |
| C | 2.417034  | 0.234462  | -0.188623 |
| C | 0.689057  | -1.393759 | 0.443205  |
| C | 2.016653  | -1.050407 | 0.286417  |
| C | -1.593266 | 0.300840  | 0.788992  |
| C | -1.492883 | -0.981130 | -0.871312 |
| C | -2.494327 | -0.372692 | -0.232942 |
| H | -1.230268 | 2.634385  | 0.458478  |
| H | 1.841995  | 2.276132  | -0.627902 |
| H | 3.478992  | 0.433641  | -0.301911 |
| H | 0.412780  | -2.402247 | 0.740090  |
| H | 2.789806  | -1.779402 | 0.509165  |
| H | -1.738285 | 0.156428  | 1.860959  |
| H | -1.411566 | -1.620111 | -1.744113 |
| H | -3.560869 | -0.282005 | -0.401182 |

23

Sum of electronic and zero-point Energies= -385.336218

|   |          |           |           |
|---|----------|-----------|-----------|
| C | 1.427889 | -0.797232 | 0.642340  |
| C | 2.182902 | -0.682965 | -0.673485 |

|   |           |           |           |
|---|-----------|-----------|-----------|
| C | -0.050010 | 0.719811  | 0.281995  |
| C | -0.050144 | -0.719808 | 0.282047  |
| C | -1.189054 | -1.469479 | 0.021678  |
| C | -2.339269 | -0.717787 | -0.223102 |
| C | -1.188708 | 1.469616  | 0.021565  |
| C | 2.183361  | 0.682940  | -0.673093 |
| C | -2.339115 | 0.718034  | -0.223128 |
| C | 1.428182  | 0.796837  | 0.642532  |
| H | 1.784704  | -1.417759 | 1.463104  |
| H | 2.507991  | -1.431315 | -1.389452 |
| H | -1.209960 | -2.554239 | 0.035204  |
| H | -3.281708 | -1.225097 | -0.407640 |
| H | -1.209682 | 2.554368  | 0.035130  |
| H | 2.509063  | 1.431561  | -1.388511 |
| H | -3.281479 | 1.225562  | -0.407450 |
| H | 1.784873  | 1.417130  | 1.463526  |

24

Sum of electronic and zero-point Energies= -385.294701

|   |           |           |           |
|---|-----------|-----------|-----------|
| C | 0.834656  | 1.590392  | -0.207636 |
| C | 0.077210  | -0.268383 | -0.484609 |
| C | -0.400941 | 0.987921  | 0.005365  |
| C | -1.730809 | 1.188186  | 0.454317  |
| C | -2.540527 | 0.068871  | 0.373144  |
| C | -0.726166 | -1.382670 | -0.554852 |
| C | -2.051384 | -1.174134 | -0.117697 |
| C | 1.488283  | 0.318339  | -0.741528 |
| H | 1.233234  | 2.586735  | -0.026519 |
| H | -2.094695 | 2.140677  | 0.825464  |
| H | -3.577825 | 0.125646  | 0.686674  |
| H | -0.399660 | -2.349551 | -0.923025 |
| H | -2.746850 | -2.008540 | -0.157869 |
| H | 1.799205  | 0.372492  | -1.790949 |
| C | 2.474030  | -1.032260 | 1.118713  |
| C | 2.638678  | -0.201969 | 0.123818  |
| H | 1.776264  | -1.589652 | 1.723983  |
| H | 3.632142  | 0.156437  | -0.151961 |

25

Sum of electronic and zero-point Energies= -385.314493

|   |           |           |           |
|---|-----------|-----------|-----------|
| C | -3.443596 | -0.000182 | 0.000011  |
| C | -3.388680 | 0.002562  | 1.317892  |
| C | 1.022484  | -1.245069 | -0.130747 |
| C | 1.020965  | 1.244229  | -0.133647 |
| C | 2.365460  | 1.231690  | 0.173827  |
| C | 3.031449  | 0.001333  | 0.326970  |
| C | 0.318936  | -0.000969 | -0.292299 |
| C | -1.008436 | -0.002319 | -0.590393 |
| C | 2.367114  | -1.230205 | 0.176478  |
| C | -2.269689 | -0.001822 | -0.899492 |
| H | -4.406069 | -0.000921 | -0.518364 |
| H | -4.085137 | 0.004424  | 2.146001  |



|   |           |           |           |
|---|-----------|-----------|-----------|
| H | 0.479360  | -2.176302 | -0.253672 |
| H | 0.476652  | 2.174524  | -0.258409 |
| H | 2.910146  | 2.161741  | 0.297442  |
| H | 4.090925  | 0.002319  | 0.568785  |
| H | 2.913052  | -2.159254 | 0.301972  |
| H | -2.474971 | -0.002019 | -1.975359 |

P3a

Sum of electronic and zero-point Energies= -385.312590

|   |           |           |           |
|---|-----------|-----------|-----------|
| C | 3.420908  | -0.213552 | 0.153196  |
| C | 3.501479  | 0.680541  | 1.107130  |
| C | -0.955176 | 1.169351  | -0.382781 |
| C | -1.062054 | -1.263372 | 0.126906  |
| C | -2.406065 | -1.131305 | 0.408969  |
| C | -3.019734 | 0.129797  | 0.295110  |
| C | -0.306596 | -0.108560 | -0.274540 |
| C | 1.020820  | -0.228048 | -0.557448 |
| C | -2.301212 | 1.273847  | -0.098884 |
| C | 2.280646  | -0.351312 | -0.818268 |
| H | 4.232572  | -0.918340 | -0.030243 |
| H | 2.986323  | 1.517802  | 1.554575  |
| H | -0.373710 | 2.031824  | -0.691713 |
| H | -0.559185 | -2.221814 | 0.202671  |
| H | -2.990264 | -1.992702 | 0.715011  |
| H | -4.079424 | 0.222916  | 0.516824  |
| H | -2.806727 | 2.230495  | -0.178068 |
| H | 2.552320  | -0.614504 | -1.845391 |

## H<sub>2</sub> elimination (azulene)

TS1\_26

Sum of electronic and zero-point Energies= -385.313153

|   |           |           |           |
|---|-----------|-----------|-----------|
| C | -1.905795 | -1.238133 | 0.276369  |
| C | -0.543524 | -1.631470 | -0.073587 |
| C | 0.484439  | 0.748154  | 0.106475  |
| C | 0.491758  | -0.744367 | -0.093546 |
| C | 1.882471  | -1.123957 | -0.182120 |
| C | 2.672645  | -0.004593 | 0.008301  |
| C | -0.571820 | 1.646565  | 0.015667  |
| C | -1.919189 | 1.293082  | -0.260421 |
| C | 1.840157  | 1.130673  | 0.185136  |
| C | -2.367245 | 0.066338  | 0.115034  |
| H | -0.347271 | -2.690491 | -0.221586 |
| H | 2.229904  | -2.139198 | -0.331208 |
| H | 3.755558  | 0.011081  | 0.017366  |
| H | -0.329636 | 2.706501  | 0.073293  |
| H | -2.598592 | 2.034282  | -0.673236 |
| H | 2.186644  | 2.148567  | 0.322870  |
| H | -2.494341 | -1.930092 | 0.883862  |
| H | -2.785643 | -0.994395 | -0.655208 |

TS26\_P10

Sum of electronic and zero-point Energies= -385.259030

|   |           |           |           |
|---|-----------|-----------|-----------|
| C | 1.876419  | -1.093480 | 0.062744  |
| C | 0.574405  | -1.625509 | -0.076102 |
| C | -0.484193 | 0.730135  | 0.091232  |
| C | -0.489814 | -0.751761 | -0.082558 |
| C | -1.872506 | -1.143736 | -0.156250 |
| C | -2.679720 | -0.018659 | 0.011920  |
| C | 0.553127  | 1.652478  | 0.047196  |
| C | 1.923658  | 1.364501  | -0.215553 |
| C | -1.863874 | 1.110869  | 0.168707  |
| C | 2.391265  | 0.107720  | 0.014517  |
| H | 0.409352  | -2.696683 | -0.172715 |
| H | -2.214047 | -2.163467 | -0.289308 |
| H | -3.762491 | -0.016437 | 0.017662  |
| H | 0.276708  | 2.702259  | 0.130788  |
| H | 2.569627  | 2.159432  | -0.582850 |
| H | -2.208673 | 2.129729  | 0.301575  |
| H | 2.807045  | -2.102970 | 0.308157  |
| H | 2.549869  | -2.007218 | 1.091564  |

TS26\_27

Sum of electronic and zero-point Energies= -385.306536

|   |           |           |           |
|---|-----------|-----------|-----------|
| C | 2.033378  | -1.204970 | -0.043502 |
| C | 0.636691  | -1.613383 | 0.001600  |
| C | -0.531841 | 0.765581  | 0.037541  |
| C | -0.498238 | -0.758005 | -0.007466 |
| C | -1.810144 | -1.180799 | -0.045017 |
| C | -2.666663 | -0.036437 | -0.029381 |
| C | 0.512414  | 1.659422  | 0.026842  |
| C | 1.914358  | 1.363507  | -0.035997 |
| C | -1.903935 | 1.121890  | 0.029477  |
| C | 2.454004  | 0.123094  | -0.061667 |
| H | 2.768546  | -2.007469 | -0.073077 |
| H | 1.259777  | -1.532408 | 1.091591  |
| H | -2.144085 | -2.210899 | -0.083831 |
| H | -3.749042 | -0.077065 | -0.063203 |
| H | 0.254144  | 2.716149  | 0.040896  |
| H | 2.591364  | 2.216481  | -0.074298 |
| H | -2.279315 | 2.137282  | 0.049432  |
| H | 0.458464  | -2.681468 | -0.122089 |

TS27\_P9

Sum of electronic and zero-point Energies= -385.246691

|   |           |           |           |
|---|-----------|-----------|-----------|
| C | 2.068708  | 1.246543  | -0.000090 |
| C | 0.704328  | 1.377554  | 0.000011  |
| C | -0.528309 | -0.813396 | -0.000025 |
| C | -0.487125 | 0.721879  | 0.000013  |
| C | -1.813214 | 1.167015  | 0.000010  |
| C | -2.652099 | 0.040330  | -0.000025 |
| C | 0.549886  | -1.683689 | -0.000015 |
| C | 1.928115  | -1.357649 | 0.000055  |
| C | -1.890967 | -1.138513 | -0.000014 |

|   |           |           |           |
|---|-----------|-----------|-----------|
| C | 2.402711  | -0.084989 | 0.000018  |
| H | 2.776615  | 2.070666  | -0.000399 |
| H | -2.129557 | 2.202967  | 0.000002  |
| H | -3.734754 | 0.083173  | -0.000048 |
| H | 0.310237  | -2.744651 | 0.000015  |
| H | 2.646052  | -2.175869 | 0.000180  |
| H | -2.279543 | -2.149303 | 0.000018  |
| H | 0.359390  | 2.931373  | 0.392740  |
| H | 0.359364  | 2.931128  | -0.392143 |

TS1\_28

Sum of electronic and zero-point Energies= -385.305913

|   |           |           |           |
|---|-----------|-----------|-----------|
| C | 1.739088  | 1.348438  | -0.080709 |
| C | 0.389276  | 1.709132  | -0.008249 |
| C | -0.476044 | -0.753251 | -0.008176 |
| C | -0.621350 | 0.774341  | -0.003333 |
| C | -2.010578 | 1.051430  | 0.008676  |
| C | -2.691111 | -0.155906 | -0.000549 |
| C | 0.692630  | -1.543741 | 0.007291  |
| C | 2.020378  | -1.166606 | 0.000917  |
| C | -1.762358 | -1.249035 | -0.005432 |
| C | 2.526676  | 0.181152  | -0.053554 |
| H | 0.143764  | 2.768857  | 0.021299  |
| H | -2.448656 | 2.041187  | 0.012607  |
| H | -3.769673 | -0.266846 | -0.001708 |
| H | 0.511372  | -2.616790 | 0.023021  |
| H | 2.776542  | -1.944317 | 0.029800  |
| H | -2.034574 | -2.297484 | -0.004449 |
| H | 2.390086  | 0.826941  | 1.034146  |
| H | 3.591500  | 0.312725  | -0.256002 |

TS28\_P10

Sum of electronic and zero-point Energies= -385.251987

|   |           |           |           |
|---|-----------|-----------|-----------|
| C | 1.696495  | 1.335524  | 0.080750  |
| C | 0.434233  | 1.685329  | -0.309964 |
| C | -0.442896 | -0.679650 | -0.025460 |
| C | -0.596152 | 0.756669  | -0.051497 |
| C | -2.015478 | 1.033562  | 0.070716  |
| C | -2.713906 | -0.177943 | 0.161002  |
| C | 0.693134  | -1.500029 | -0.203117 |
| C | 2.032610  | -1.138657 | -0.129940 |
| C | -1.795091 | -1.221228 | 0.077711  |
| C | 2.347938  | 0.203744  | 0.190684  |
| H | 0.212347  | 2.659277  | -0.743153 |
| H | -2.447550 | 2.027499  | 0.078364  |
| H | -3.786855 | -0.283636 | 0.255602  |
| H | 0.492169  | -2.551345 | -0.399199 |
| H | 2.803699  | -1.882039 | -0.317585 |
| H | -2.025327 | -2.280588 | 0.079746  |
| H | 3.264443  | 0.169491  | 1.307145  |
| H | 3.641745  | 0.357421  | 0.573780  |

## TS8\_P11

Sum of electronic and zero-point Energies= -385.248212

|   |           |           |           |
|---|-----------|-----------|-----------|
| C | 1.804999  | 1.216079  | -0.073043 |
| C | 0.561175  | 1.521484  | 0.197182  |
| C | -0.453886 | -0.686781 | 0.119914  |
| C | -0.598741 | 0.734240  | 0.044931  |
| C | -1.990929 | 1.033002  | -0.174539 |
| C | -2.706796 | -0.178248 | -0.186607 |
| C | 0.710865  | -1.467650 | 0.254885  |
| C | 2.056384  | -1.132774 | 0.050330  |
| C | -1.812682 | -1.228021 | -0.002112 |
| C | 2.537352  | 0.128211  | -0.409553 |
| H | 0.445472  | 2.372869  | 1.363963  |
| H | 0.363856  | 2.789791  | 0.629711  |
| H | -2.411382 | 2.025429  | -0.290415 |
| H | -3.777387 | -0.271823 | -0.314149 |
| H | 0.532887  | -2.523908 | 0.447923  |
| H | 2.778770  | -1.939546 | 0.154369  |
| H | -2.055556 | -2.283665 | 0.034351  |
| H | 3.476898  | 0.193596  | -0.954081 |

## TS9\_P11

Sum of electronic and zero-point Energies= -385.257545

|   |           |           |           |
|---|-----------|-----------|-----------|
| C | 1.827353  | -1.139134 | 0.054996  |
| C | 0.564883  | -1.493915 | 0.096047  |
| C | -0.590187 | 0.682317  | 0.138400  |
| C | -0.590626 | -0.786866 | -0.054649 |
| C | -1.950869 | -1.192854 | -0.204867 |
| C | -2.768694 | -0.060782 | -0.048734 |
| C | 0.496524  | 1.536774  | 0.065359  |
| C | 1.881493  | 1.264296  | -0.151311 |
| C | -1.974011 | 1.070478  | 0.168116  |
| C | 2.548758  | 0.052896  | -0.151411 |
| H | 2.709047  | -2.224106 | 0.230768  |
| H | 2.709378  | -1.956067 | 1.011361  |
| H | -2.282751 | -2.213344 | -0.349812 |
| H | -3.850549 | -0.063686 | -0.100238 |
| H | 0.256373  | 2.596830  | 0.123412  |
| H | 2.497919  | 2.140995  | -0.331624 |
| H | -2.329917 | 2.089804  | 0.263996  |
| H | 3.622755  | 0.030310  | -0.319538 |

## TS9\_29

Sum of electronic and zero-point Energies= -385.306209

|   |           |           |           |
|---|-----------|-----------|-----------|
| C | 1.885425  | -1.347678 | -0.034876 |
| C | 0.509950  | -1.564239 | -0.034611 |
| C | -0.589032 | 0.735308  | 0.011540  |
| C | -0.607458 | -0.807344 | -0.009268 |
| C | -1.963024 | -1.192440 | -0.013150 |
| C | -2.743838 | -0.035115 | 0.006838  |
| C | 0.531210  | 1.571279  | -0.012717 |
| C | 1.887345  | 1.249362  | -0.035610 |

|   |           |           |           |
|---|-----------|-----------|-----------|
| C | -1.919352 | 1.123391  | 0.020718  |
| C | 2.514806  | -0.027877 | -0.026963 |
| H | 2.564886  | -2.197250 | -0.070409 |
| H | 2.338514  | -0.623747 | 1.068476  |
| H | -2.320851 | -2.213245 | -0.030015 |
| H | -3.827831 | -0.018883 | 0.007915  |
| H | 0.309353  | 2.636747  | -0.022419 |
| H | 2.578857  | 2.085627  | -0.060052 |
| H | -2.274850 | 2.146847  | 0.032735  |
| H | 3.595730  | -0.043977 | -0.157639 |

TS29\_P9

Sum of electronic and zero-point Energies= -385.247420

|   |           |           |           |
|---|-----------|-----------|-----------|
| C | 1.935226  | -1.354383 | -0.193315 |
| C | 0.580991  | -1.488382 | -0.058011 |
| C | -0.624274 | 0.724842  | -0.128914 |
| C | -0.568192 | -0.781134 | 0.064418  |
| C | -1.900059 | -1.215785 | 0.197518  |
| C | -2.751636 | -0.097735 | 0.047141  |
| C | 0.454447  | 1.579012  | -0.056148 |
| C | 1.816558  | 1.226419  | 0.162778  |
| C | -2.000016 | 1.061588  | -0.158137 |
| C | 2.302791  | -0.044862 | 0.039327  |
| H | 2.599085  | -2.120294 | -0.586662 |
| H | -2.210681 | -2.243317 | 0.335531  |
| H | -3.833266 | -0.138006 | 0.097074  |
| H | 0.252326  | 2.646923  | -0.082239 |
| H | 2.504236  | 2.021804  | 0.430473  |
| H | -2.392501 | 2.066610  | -0.254910 |
| H | 3.814972  | 0.105119  | -0.115037 |
| H | 3.790804  | 0.003687  | 0.675832  |

TS29\_30

Sum of electronic and zero-point Energies= -385.308096

|   |           |           |           |
|---|-----------|-----------|-----------|
| C | 1.903053  | -1.370600 | -0.010300 |
| C | 0.555718  | -1.567188 | -0.008438 |
| C | -0.602067 | 0.725796  | 0.005769  |
| C | -0.594341 | -0.814991 | -0.000831 |
| C | -1.917729 | -1.211838 | -0.006818 |
| C | -2.743766 | -0.045007 | 0.001736  |
| C | 0.485844  | 1.565360  | -0.017375 |
| C | 1.869857  | 1.224044  | -0.065086 |
| C | -1.963039 | 1.105684  | 0.012327  |
| C | 2.514251  | -0.073934 | -0.031593 |
| H | 2.575169  | -2.225298 | 0.002008  |
| H | -2.268429 | -2.235692 | -0.016467 |
| H | -3.827737 | -0.063324 | -0.002293 |
| H | 0.284171  | 2.633788  | -0.023434 |
| H | 2.565279  | 2.057129  | -0.131498 |
| H | -2.325800 | 2.126078  | 0.016874  |
| H | 3.593002  | -0.044514 | -0.180321 |
| H | 2.357663  | 0.527875  | 1.058768  |

## TS30\_P13

Sum of electronic and zero-point Energies= -385.236622

|   |           |           |           |
|---|-----------|-----------|-----------|
| C | -1.833643 | -1.470604 | -0.002374 |
| C | -0.455730 | -1.585135 | 0.050134  |
| C | 0.588838  | 0.738991  | -0.083944 |
| C | 0.641917  | -0.786268 | 0.005475  |
| C | 2.012826  | -1.122682 | 0.067335  |
| C | 2.762243  | 0.055106  | 0.012232  |
| C | -0.580156 | 1.504579  | 0.035854  |
| C | -1.769992 | 0.870180  | -0.099490 |
| C | 1.910175  | 1.183246  | -0.070600 |
| C | -2.535932 | -0.238698 | -0.004141 |
| H | -2.435726 | -2.358668 | -0.189939 |
| H | 2.400123  | -2.130173 | 0.141037  |
| H | 3.844801  | 0.104381  | 0.027270  |
| H | -0.533682 | 2.579454  | 0.199995  |
| H | 2.227307  | 2.218660  | -0.098014 |
| H | -3.612416 | -0.228102 | -0.153057 |
| H | -3.190470 | 2.474311  | 0.680635  |
| H | -3.143215 | 2.447842  | -0.070818 |

## TS30\_31

Sum of electronic and zero-point Energies= -385.307912

|   |           |           |           |
|---|-----------|-----------|-----------|
| C | 1.893427  | -1.377833 | -0.016098 |
| C | 0.506568  | -1.562218 | 0.023077  |
| C | -0.590105 | 0.721007  | -0.001915 |
| C | -0.610773 | -0.806081 | 0.031214  |
| C | -1.975201 | -1.186167 | 0.016825  |
| C | -2.744282 | -0.029661 | -0.028141 |
| C | 0.574972  | 1.538925  | 0.001551  |
| C | 1.967369  | 1.140916  | -0.060529 |
| C | -1.902678 | 1.129894  | -0.033078 |
| C | 2.547938  | -0.159594 | -0.045323 |
| H | 2.513750  | -2.273004 | -0.021716 |
| H | -2.335992 | -2.205904 | 0.026816  |
| H | -3.827205 | -0.000389 | -0.061467 |
| H | 0.411995  | 2.609429  | -0.120320 |
| H | 2.659363  | 1.978430  | -0.102431 |
| H | -2.252322 | 2.155224  | -0.064441 |
| H | 3.633782  | -0.178351 | -0.071773 |
| H | 1.193218  | 1.459446  | 1.089839  |

## TS31\_P12

Sum of electronic and zero-point Energies= -385.242786

|   |           |           |           |
|---|-----------|-----------|-----------|
| C | -1.947874 | -1.359826 | 0.000120  |
| C | -0.582309 | -1.555639 | -0.000100 |
| C | 0.618785  | 0.728275  | -0.000067 |
| C | 0.574751  | -0.853260 | -0.000202 |
| C | 1.926204  | -1.226113 | -0.000038 |
| C | 2.738045  | -0.085385 | 0.000064  |
| C | -0.597197 | 1.288806  | -0.000022 |

|   |           |           |           |
|---|-----------|-----------|-----------|
| C | -1.953549 | 1.168722  | -0.000102 |
| C | 1.961803  | 1.087473  | 0.000109  |
| C | -2.564564 | -0.105735 | 0.000138  |
| H | -2.593822 | -2.235458 | 0.000182  |
| H | 2.257515  | -2.256735 | 0.000172  |
| H | 3.821423  | -0.097982 | 0.000110  |
| H | -2.578392 | 2.054765  | -0.000428 |
| H | 2.327372  | 2.107212  | 0.000079  |
| H | -3.650932 | -0.087230 | 0.000156  |
| H | -0.313866 | 2.995607  | 0.385432  |
| H | -0.313875 | 2.995912  | -0.385107 |

26

Sum of electronic and zero-point Energies= -385.353797

|   |           |           |           |
|---|-----------|-----------|-----------|
| C | 2.392720  | -0.055083 | 0.000000  |
| C | 1.347951  | 1.023555  | 0.000000  |
| C | -0.847594 | -0.342568 | 0.000000  |
| C | 0.000000  | 0.885231  | 0.000000  |
| C | -0.922605 | 1.994234  | 0.000000  |
| C | -2.225795 | 1.518843  | 0.000000  |
| C | -0.481946 | -1.672641 | 0.000000  |
| C | 0.850562  | -2.207470 | 0.000000  |
| C | -2.187884 | 0.107620  | 0.000000  |
| C | 1.951870  | -1.448040 | 0.000000  |
| H | 1.753200  | 2.034900  | 0.000000  |
| H | -0.623963 | 3.036643  | 0.000000  |
| H | -3.123856 | 2.123478  | 0.000000  |
| H | -1.290300 | -2.402381 | 0.000000  |
| H | 0.952020  | -3.291770 | 0.000000  |
| H | -3.055095 | -0.544042 | 0.000000  |
| H | 3.062164  | 0.110546  | 0.863782  |
| H | 3.062164  | 0.110546  | -0.863782 |

27

Sum of electronic and zero-point Energies= -385.341289

|   |           |           |           |
|---|-----------|-----------|-----------|
| C | -1.827862 | -1.214866 | -0.474573 |
| C | -0.644811 | -1.676359 | 0.383289  |
| C | 0.419512  | 0.765301  | -0.017022 |
| C | 0.489698  | -0.717417 | 0.120859  |
| C | 1.857635  | -1.080010 | 0.048863  |
| C | 2.635192  | 0.067361  | -0.110085 |
| C | -0.659053 | 1.645187  | 0.059150  |
| C | -2.031613 | 1.246661  | 0.173889  |
| C | 1.768527  | 1.198850  | -0.135994 |
| C | -2.259585 | -0.028561 | -0.157042 |
| H | -2.080941 | -1.731183 | -1.397371 |
| H | -0.351821 | -2.702287 | 0.142586  |
| H | 2.231181  | -2.094851 | 0.116075  |
| H | 3.714029  | 0.102409  | -0.199062 |
| H | -0.426294 | 2.704881  | 0.158542  |
| H | -2.766713 | 1.915938  | 0.611439  |
| H | 2.085012  | 2.231264  | -0.236196 |

|   |           |           |          |
|---|-----------|-----------|----------|
| H | -0.890293 | -1.663041 | 1.455983 |
|---|-----------|-----------|----------|

28

Sum of electronic and zero-point Energies= -385.320916

|   |           |           |           |
|---|-----------|-----------|-----------|
| C | 1.696245  | 1.335537  | 0.053402  |
| C | 0.458107  | 1.682737  | -0.304522 |
| C | -0.472220 | -0.697828 | -0.047538 |
| C | -0.599566 | 0.739351  | -0.101595 |
| C | -1.996321 | 1.051462  | 0.058463  |
| C | -2.721570 | -0.146047 | 0.163924  |
| C | 0.678191  | -1.509274 | -0.199659 |
| C | 1.998038  | -1.140245 | -0.122340 |
| C | -1.820725 | -1.215119 | 0.077635  |
| C | 2.539405  | 0.179462  | 0.356439  |
| H | 0.224102  | 2.703990  | -0.602224 |
| H | -2.407704 | 2.054053  | 0.067823  |
| H | -3.796242 | -0.228106 | 0.265277  |
| H | 0.486348  | -2.561188 | -0.403807 |
| H | 2.743259  | -1.881410 | -0.402502 |
| H | -2.074215 | -2.268882 | 0.099349  |
| H | 2.727554  | 0.152083  | 1.445137  |
| H | 3.539392  | 0.349248  | -0.074309 |

29

Sum of electronic and zero-point Energies= -385.343173

|   |           |           |           |
|---|-----------|-----------|-----------|
| C | 1.855987  | -1.249235 | -0.371134 |
| C | 0.574573  | -1.424128 | -0.202858 |
| C | -0.583335 | 0.664753  | -0.246857 |
| C | -0.605655 | -0.804545 | -0.090398 |
| C | -1.955399 | -1.178441 | 0.216309  |
| C | -2.745997 | -0.013798 | 0.181865  |
| C | 0.569071  | 1.498385  | -0.231314 |
| C | 1.868085  | 1.173158  | 0.121836  |
| C | -1.929217 | 1.098282  | -0.073767 |
| C | 2.477817  | -0.165208 | 0.504658  |
| H | 2.401398  | -1.649569 | -1.223424 |
| H | 2.317863  | -0.344442 | 1.578296  |
| H | -2.306859 | -2.190247 | 0.379251  |
| H | -3.815485 | 0.018374  | 0.349360  |
| H | 0.381620  | 2.554401  | -0.413411 |
| H | 2.556188  | 2.014301  | 0.184792  |
| H | -2.251283 | 2.133566  | -0.062565 |
| H | 3.560981  | -0.131718 | 0.357670  |

30

Sum of electronic and zero-point Energies= -385.352121

|   |           |           |          |
|---|-----------|-----------|----------|
| C | -0.588885 | -2.290252 | 0.000000 |
| C | 0.594777  | -1.534360 | 0.000000 |
| C | 0.000000  | 0.915331  | 0.000000 |
| C | 0.960451  | -0.231305 | 0.000000 |
| C | 2.257256  | 0.328875  | 0.000000 |
| C | 2.156984  | 1.737985  | 0.000000 |



|   |           |           |           |
|---|-----------|-----------|-----------|
| C | -1.354215 | 0.867467  | 0.000000  |
| C | -2.274462 | -0.309893 | 0.000000  |
| C | 0.814471  | 2.098966  | 0.000000  |
| C | -1.835999 | -1.739157 | 0.000000  |
| H | -0.500715 | -3.374412 | 0.000000  |
| H | 3.177222  | -0.243945 | 0.000000  |
| H | 2.996040  | 2.422426  | 0.000000  |
| H | -1.881100 | 1.821104  | 0.000000  |
| H | -2.963905 | -0.181543 | 0.855000  |
| H | 0.427325  | 3.111977  | 0.000000  |
| H | -2.673227 | -2.436010 | 0.000000  |
| H | -2.963905 | -0.181543 | -0.855000 |

31

Sum of electronic and zero-point Energies= -385.332079

|   |           |           |           |
|---|-----------|-----------|-----------|
| C | 1.942295  | -1.243585 | 0.273226  |
| C | 0.641485  | -1.375192 | 0.267015  |
| C | -0.592990 | 0.640461  | 0.346802  |
| C | -0.576245 | -0.809512 | 0.239015  |
| C | -1.889777 | -1.212473 | -0.212674 |
| C | -2.689322 | -0.045715 | -0.311943 |
| C | 0.661726  | 1.428973  | 0.542605  |
| C | 1.790206  | 1.085340  | -0.457447 |
| C | -1.906217 | 1.072643  | -0.025865 |
| C | 2.392245  | -0.109389 | -0.583152 |
| H | 2.633885  | -1.814055 | 0.890310  |
| H | -2.204087 | -2.229825 | -0.412711 |
| H | -3.734517 | -0.031286 | -0.595493 |
| H | 0.450369  | 2.499351  | 0.502490  |
| H | 2.154754  | 1.922102  | -1.048049 |
| H | -2.219217 | 2.107520  | -0.102222 |
| H | 3.235469  | -0.253163 | -1.253911 |
| H | 1.042912  | 1.210035  | 1.554094  |

## H<sub>2</sub> elimination (naphthalene)

TS17\_32

Sum of electronic and zero-point Energies= -385.346302

|   |           |           |           |
|---|-----------|-----------|-----------|
| C | -2.445344 | -0.847282 | -0.039466 |
| C | -1.203564 | -1.425209 | 0.015671  |
| C | -0.011366 | 0.676532  | 0.057972  |
| C | 0.032405  | -0.795629 | 0.036299  |
| C | 2.448801  | -0.699644 | -0.032149 |
| C | 2.415143  | 0.726982  | -0.055906 |
| C | -1.341201 | 1.322982  | -0.037461 |
| C | -2.508714 | 0.561866  | -0.064351 |
| C | 1.232393  | 1.411071  | -0.012277 |
| C | 1.293758  | -1.444699 | 0.016056  |
| H | -3.354947 | -1.441169 | -0.062304 |
| H | 3.410588  | -1.202179 | -0.057430 |
| H | 3.349301  | 1.276375  | -0.115411 |

|   |           |           |           |
|---|-----------|-----------|-----------|
| H | -1.369350 | 2.408347  | -0.058131 |
| H | -3.467849 | 1.066929  | -0.124398 |
| H | 1.205349  | 2.496852  | -0.022016 |
| H | 1.322435  | -2.528892 | 0.023144  |
| H | -0.569389 | 1.001924  | 1.110215  |

TS32\_33

Sum of electronic and zero-point Energies= -385.361017

|   |           |           |           |
|---|-----------|-----------|-----------|
| C | -2.431734 | -0.882594 | -0.016217 |
| C | -1.192228 | -1.425571 | -0.007102 |
| C | 0.016324  | 0.672422  | -0.005197 |
| C | 0.055470  | -0.771792 | -0.002032 |
| C | 2.468628  | -0.685057 | 0.002697  |
| C | 2.430909  | 0.727243  | -0.005383 |
| C | -1.261506 | 1.316131  | -0.048278 |
| C | -2.482366 | 0.555580  | -0.043703 |
| C | 1.224020  | 1.402200  | -0.003646 |
| C | 1.303035  | -1.431083 | 0.006997  |
| H | -3.348570 | -1.462962 | -0.011502 |
| H | 3.429098  | -1.190928 | 0.006195  |
| H | 3.360965  | 1.286571  | -0.010687 |
| H | -1.327332 | 2.397882  | -0.139297 |
| H | -3.426304 | 1.081239  | -0.172638 |
| H | 1.197356  | 2.488194  | -0.008870 |
| H | 1.330899  | -2.515312 | 0.016160  |
| H | -1.999427 | 1.050445  | 1.051829  |

TS33\_34

Sum of electronic and zero-point Energies= -385.351581

|   |           |           |           |
|---|-----------|-----------|-----------|
| C | -2.423009 | -0.846807 | -0.028522 |
| C | -1.167852 | -1.423460 | -0.036854 |
| C | 0.002552  | 0.689937  | -0.012211 |
| C | 0.053477  | -0.772900 | -0.014993 |
| C | 2.469126  | -0.690470 | 0.008305  |
| C | 2.426991  | 0.732173  | 0.010907  |
| C | -1.244084 | 1.344393  | -0.029636 |
| C | -2.454351 | 0.637102  | -0.033118 |
| C | 1.229750  | 1.407867  | 0.004249  |
| C | 1.313339  | -1.433844 | -0.001796 |
| H | -3.351026 | -1.405626 | -0.110050 |
| H | 3.432281  | -1.191056 | 0.014593  |
| H | 3.359297  | 1.288167  | 0.019049  |
| H | -1.275936 | 2.429420  | -0.053070 |
| H | -3.414827 | 1.136601  | -0.119639 |
| H | 1.205002  | 2.493555  | 0.008484  |
| H | 1.338713  | -2.518054 | -0.002122 |
| H | -2.529127 | -0.096948 | 1.044774  |

TS2\_34

Sum of electronic and zero-point Energies= -385.360847

|   |          |          |           |
|---|----------|----------|-----------|
| C | 2.462124 | 0.676930 | -0.003385 |
| C | 1.271678 | 1.351254 | -0.000051 |

|   |           |           |           |
|---|-----------|-----------|-----------|
| C | -0.063237 | -0.753890 | -0.009311 |
| C | -0.002861 | 0.691574  | -0.006941 |
| C | -1.219226 | 1.404063  | 0.004330  |
| C | -2.427313 | 0.726490  | 0.001817  |
| C | -1.305082 | -1.425066 | -0.002856 |
| C | 1.188915  | -1.393396 | -0.066981 |
| C | -2.472469 | -0.684368 | -0.002440 |
| C | 2.449524  | -0.769803 | -0.055933 |
| H | 3.417550  | 1.189432  | 0.020107  |
| H | 1.278480  | 2.437921  | 0.010690  |
| H | -1.197359 | 2.489819  | 0.020855  |
| H | -3.356133 | 1.288437  | 0.006522  |
| H | -1.327273 | -2.509614 | -0.012306 |
| H | -3.432567 | -1.190212 | -0.003780 |
| H | 1.967395  | -1.301486 | 1.030756  |
| H | 3.357586  | -1.347029 | -0.222347 |

#### TS13\_35

Sum of electronic and zero-point Energies= -385.360454

|   |           |           |           |
|---|-----------|-----------|-----------|
| C | -2.481823 | -0.821623 | -0.009570 |
| C | -1.256749 | -1.418917 | -0.006538 |
| C | -0.073802 | 0.692151  | 0.000610  |
| C | -0.034558 | -0.751627 | -0.005706 |
| C | 2.442599  | -0.637465 | -0.043619 |
| C | 2.379928  | 0.792457  | -0.019146 |
| C | -1.331112 | 1.335535  | 0.011220  |
| C | -2.504735 | 0.599438  | 0.003388  |
| C | 1.158718  | 1.417848  | -0.008331 |
| C | 1.233070  | -1.410308 | -0.045798 |
| H | -3.407403 | -1.389834 | -0.017747 |
| H | 3.391746  | -1.154811 | -0.160466 |
| H | 3.304159  | 1.358658  | -0.022141 |
| H | -1.369952 | 2.420445  | 0.022951  |
| H | -3.463469 | 1.110088  | 0.007567  |
| H | 1.114176  | 2.503856  | -0.004353 |
| H | 1.290230  | -2.492002 | -0.137615 |
| H | 1.951299  | -1.141330 | 1.052747  |

#### TS35\_36

Sum of electronic and zero-point Energies= -385.352134

|   |           |           |           |
|---|-----------|-----------|-----------|
| C | -2.478360 | -0.825687 | 0.007966  |
| C | -1.264077 | -1.425682 | 0.002718  |
| C | -0.070429 | 0.691865  | -0.009032 |
| C | -0.021998 | -0.770380 | -0.009003 |
| C | 2.414124  | -0.715312 | -0.034673 |
| C | 2.373710  | 0.752718  | -0.033828 |
| C | -1.339606 | 1.338836  | 0.002290  |
| C | -2.504101 | 0.607484  | 0.007020  |
| C | 1.134344  | 1.412164  | -0.029518 |
| C | 1.211974  | -1.438794 | -0.029223 |
| H | -3.407050 | -1.389500 | 0.013279  |
| H | 3.377513  | -1.210388 | -0.104964 |

|   |           |           |           |
|---|-----------|-----------|-----------|
| H | 3.308600  | 1.299432  | -0.107311 |
| H | -1.373930 | 2.423909  | 0.004593  |
| H | -3.464947 | 1.113906  | 0.011250  |
| H | 1.115615  | 2.497579  | -0.056166 |
| H | 1.237868  | -2.523053 | -0.054653 |
| H | 2.472845  | 0.024841  | 1.045669  |

TS36\_37

Sum of electronic and zero-point Energies= -385.359984

|   |           |           |           |
|---|-----------|-----------|-----------|
| C | -2.480479 | -0.816977 | 0.005830  |
| C | -1.257721 | -1.421027 | 0.011562  |
| C | -0.081989 | 0.672424  | -0.005226 |
| C | -0.025352 | -0.770770 | 0.001515  |
| C | 2.422379  | -0.754333 | -0.019502 |
| C | 2.406357  | 0.676570  | -0.042573 |
| C | -1.330515 | 1.332993  | -0.008014 |
| C | -2.506973 | 0.603889  | -0.008469 |
| C | 1.156578  | 1.385255  | -0.045218 |
| C | 1.236112  | -1.443475 | -0.008070 |
| H | -3.406698 | -1.384796 | 0.012315  |
| H | 3.375776  | -1.269828 | -0.023581 |
| H | 3.326024  | 1.244411  | -0.161175 |
| H | -1.361069 | 2.418506  | -0.016309 |
| H | -3.464212 | 1.116594  | -0.016314 |
| H | 1.170055  | 2.469302  | -0.135352 |
| H | 1.236672  | -2.529276 | -0.004237 |
| H | 1.893072  | 1.147790  | 1.053640  |

TS17\_37

Sum of electronic and zero-point Energies= -385.345675

|   |           |           |           |
|---|-----------|-----------|-----------|
| C | -2.460129 | -0.833978 | -0.030030 |
| C | -1.246370 | -1.434899 | 0.017432  |
| C | -0.055193 | 0.675935  | 0.055740  |
| C | -0.001343 | -0.794897 | 0.035250  |
| C | 2.435373  | -0.715515 | -0.036633 |
| C | 2.431713  | 0.687367  | -0.063725 |
| C | -1.341241 | 1.338554  | -0.011639 |
| C | -2.493114 | 0.602034  | -0.055290 |
| C | 1.232030  | 1.395890  | -0.037779 |
| C | 1.248407  | -1.440201 | 0.012203  |
| H | -3.387327 | -1.400022 | -0.049868 |
| H | 3.382776  | -1.244478 | -0.060113 |
| H | 3.364211  | 1.238423  | -0.126855 |
| H | -1.371141 | 2.423925  | -0.019523 |
| H | -3.454190 | 1.104262  | -0.113175 |
| H | 1.204839  | 2.481551  | -0.066218 |
| H | 1.270947  | -2.525427 | 0.015694  |
| H | 0.489085  | 1.040028  | 1.106895  |

TS33\_P4

Sum of electronic and zero-point Energies= -385.286697

|   |           |          |          |
|---|-----------|----------|----------|
| C | -2.294288 | 0.287319 | 0.000000 |
|---|-----------|----------|----------|

|   |           |           |           |
|---|-----------|-----------|-----------|
| C | -1.333443 | 1.229035  | 0.000000  |
| C | 0.129407  | -0.751808 | 0.000000  |
| C | 0.000000  | 0.693366  | 0.000000  |
| C | 1.168613  | 1.488400  | 0.000000  |
| C | 2.405411  | 0.876566  | 0.000000  |
| C | 1.416988  | -1.347220 | 0.000000  |
| C | -1.088605 | -1.417409 | 0.000000  |
| C | 2.529331  | -0.534843 | 0.000000  |
| C | -2.402509 | -1.093966 | 0.000000  |
| H | -3.892335 | 1.103101  | 0.384000  |
| H | -3.892335 | 1.103101  | -0.384000 |
| H | -1.527324 | 2.294875  | 0.000000  |
| H | 1.080689  | 2.570503  | 0.000000  |
| H | 3.302608  | 1.487663  | 0.000000  |
| H | 1.507059  | -2.427706 | 0.000000  |
| H | 3.518521  | -0.981123 | 0.000000  |
| H | -3.282307 | -1.727051 | 0.000000  |

#### TS34\_P15

Sum of electronic and zero-point Energies= -385.281595

|   |           |           |           |
|---|-----------|-----------|-----------|
| C | 2.460281  | 0.712332  | -0.025251 |
| C | 1.228129  | 1.372292  | -0.003273 |
| C | -0.063672 | -0.767099 | -0.059306 |
| C | -0.020761 | 0.683003  | -0.003693 |
| C | -1.251573 | 1.380982  | 0.018470  |
| C | -2.461166 | 0.692620  | 0.053373  |
| C | -1.305920 | -1.441481 | -0.042565 |
| C | 1.198789  | -1.383778 | -0.034360 |
| C | -2.488851 | -0.710349 | 0.022717  |
| C | 2.286213  | -0.663063 | -0.011568 |
| H | 3.404988  | 1.230588  | -0.146554 |
| H | 1.226187  | 2.458356  | -0.041564 |
| H | -1.246730 | 2.466496  | -0.025864 |
| H | -3.392719 | 1.248797  | 0.080391  |
| H | -1.320286 | -2.526020 | -0.060984 |
| H | -3.441038 | -1.231307 | 0.022653  |
| H | 3.650086  | -1.434605 | 0.735903  |
| H | 3.630699  | -1.465058 | -0.051247 |

#### TS37\_P19

Sum of electronic and zero-point Energies= -385.283159

|   |           |           |           |
|---|-----------|-----------|-----------|
| C | 2.522741  | 0.580121  | -0.000001 |
| C | 1.360056  | 1.315978  | -0.000043 |
| C | -0.013196 | -0.826286 | -0.000020 |
| C | 0.100902  | 0.672374  | -0.000078 |
| C | -1.180618 | 1.116025  | 0.000050  |
| C | -2.436755 | 0.667928  | -0.000066 |
| C | -1.272702 | -1.478971 | 0.000037  |
| C | 1.248227  | -1.388006 | 0.000038  |
| C | -2.450433 | -0.768867 | 0.000040  |
| C | 2.483669  | -0.847307 | 0.000019  |
| H | 3.485243  | 1.082067  | 0.000010  |

|   |           |           |           |
|---|-----------|-----------|-----------|
| H | -1.197849 | 3.126746  | -0.378508 |
| H | 1.385780  | 2.400363  | -0.000096 |
| H | -3.338373 | 1.268489  | -0.000286 |
| H | -1.286378 | -2.563185 | 0.000049  |
| H | -3.416558 | -1.263634 | 0.000054  |
| H | 3.394664  | -1.437913 | 0.000002  |
| H | -1.197870 | 3.129135  | 0.378920  |

TS38\_39

Sum of electronic and zero-point Energies= -385.360863

|   |           |           |           |
|---|-----------|-----------|-----------|
| C | 0.057227  | 0.758880  | 0.000483  |
| C | 1.263869  | 1.506211  | 0.012564  |
| C | 0.134729  | -0.678207 | -0.005526 |
| C | 1.386328  | -1.337683 | -0.007474 |
| C | 2.425744  | 0.791678  | 0.004315  |
| C | 2.558157  | -0.594410 | -0.008863 |
| C | -1.222435 | 1.398072  | -0.009367 |
| C | -1.089153 | -1.417407 | -0.041762 |
| C | -2.397403 | 0.689752  | -0.020509 |
| C | -2.354879 | -0.738809 | -0.044633 |
| H | 1.241479  | 2.592519  | 0.025292  |
| H | 1.423956  | -2.423818 | -0.014875 |
| H | 3.530418  | -1.078041 | -0.017732 |
| H | -1.252173 | 2.484326  | -0.004502 |
| H | -1.077143 | -2.500899 | -0.136179 |
| H | -3.359324 | 1.189409  | -0.024032 |
| H | -3.262371 | -1.326895 | -0.156862 |
| H | -1.817944 | -1.205065 | 1.053523  |

TS39\_40

Sum of electronic and zero-point Energies= -385.346439

|   |           |           |           |
|---|-----------|-----------|-----------|
| C | 0.031389  | 0.782750  | 0.030728  |
| C | 1.252132  | 1.522046  | 0.010741  |
| C | 0.110553  | -0.680624 | 0.052590  |
| C | 1.398222  | -1.342638 | -0.009443 |
| C | 2.403487  | 0.807846  | -0.034376 |
| C | 2.544221  | -0.590978 | -0.056954 |
| C | -1.236586 | 1.393892  | 0.011898  |
| C | -1.161992 | -1.430979 | -0.034391 |
| C | -2.409954 | 0.649075  | -0.035917 |
| C | -2.378336 | -0.753225 | -0.062568 |
| H | 1.229864  | 2.608469  | 0.016416  |
| H | 1.435063  | -2.428615 | -0.012442 |
| H | 3.520976  | -1.062245 | -0.114228 |
| H | -1.288829 | 2.478916  | 0.017504  |
| H | -1.107571 | -2.515367 | -0.061688 |
| H | -3.367105 | 1.160458  | -0.057420 |
| H | -3.298083 | -1.325342 | -0.123805 |
| H | -0.443133 | -1.059262 | 1.101812  |

TS40\_41

Sum of electronic and zero-point Energies= -385.345648

|   |           |           |           |
|---|-----------|-----------|-----------|
| C | -0.003934 | 0.781433  | 0.030524  |
| C | 1.203581  | 1.517192  | 0.005912  |
| C | 0.066332  | -0.683191 | 0.049431  |
| C | 1.398145  | -1.324612 | -0.034026 |
| C | 2.387667  | 0.827649  | -0.041054 |
| C | 2.560082  | -0.543335 | -0.065156 |
| C | -1.283454 | 1.396036  | 0.015626  |
| C | -1.159481 | -1.448161 | -0.010075 |
| C | -2.423510 | 0.630153  | -0.028511 |
| C | -2.358762 | -0.795635 | -0.051394 |
| H | 1.173410  | 2.604295  | 0.008339  |
| H | 1.436128  | -2.410461 | -0.062405 |
| H | 3.536867  | -1.014354 | -0.121947 |
| H | -1.342100 | 2.479976  | 0.023529  |
| H | -1.104678 | -2.532655 | -0.018200 |
| H | -3.395464 | 1.113060  | -0.050313 |
| H | -3.279645 | -1.367258 | -0.107166 |
| H | 0.655493  | -1.017765 | 1.100503  |

#### TS41\_42

Sum of electronic and zero-point Energies= -385.357418

|   |           |           |           |
|---|-----------|-----------|-----------|
| C | -0.024899 | 0.756445  | -0.000548 |
| C | 1.194931  | 1.519452  | -0.009714 |
| C | 0.040022  | -0.682775 | -0.006679 |
| C | 1.318470  | -1.322375 | -0.040824 |
| C | 2.378296  | 0.864325  | -0.029559 |
| C | 2.532703  | -0.535319 | -0.039299 |
| C | -1.289337 | 1.383135  | 0.012380  |
| C | -1.153852 | -1.439301 | -0.008973 |
| C | -2.440932 | 0.617240  | 0.005628  |
| C | -2.375141 | -0.794312 | -0.008686 |
| H | 1.141738  | 2.606042  | -0.000511 |
| H | 1.397792  | -2.403347 | -0.138306 |
| H | 3.495649  | -1.027257 | -0.158612 |
| H | -1.346738 | 2.467207  | 0.023968  |
| H | -1.101963 | -2.524113 | -0.017077 |
| H | -3.410666 | 1.105348  | 0.010467  |
| H | -3.292801 | -1.373606 | -0.017031 |
| H | 2.035421  | -1.049370 | 1.054747  |

#### TS2\_42

Sum of electronic and zero-point Energies= -385.350146

|   |           |           |           |
|---|-----------|-----------|-----------|
| C | 2.434859  | 0.633997  | 0.005406  |
| C | 1.289049  | 1.390829  | 0.001546  |
| C | -1.287673 | -1.354928 | -0.023186 |
| C | 0.016639  | 0.755018  | -0.009478 |
| C | -1.179719 | 1.506727  | -0.028137 |
| C | -2.372839 | 0.811646  | -0.052290 |
| C | -0.048478 | -0.703260 | -0.005787 |
| C | 1.171584  | -1.443848 | 0.005858  |
| C | -2.499411 | -0.619137 | -0.043137 |
| C | 2.376760  | -0.790052 | 0.007373  |

|   |           |           |           |
|---|-----------|-----------|-----------|
| H | 3.403893  | 1.123622  | 0.009003  |
| H | 1.337826  | 2.475237  | 0.003273  |
| H | -1.337309 | -2.440065 | -0.030543 |
| H | -1.156652 | 2.592871  | -0.038190 |
| H | -2.611589 | 0.107522  | 1.038426  |
| H | 1.127559  | -2.528613 | 0.010129  |
| H | -3.470221 | -1.094794 | -0.153385 |
| H | 3.301865  | -1.357734 | 0.012280  |

TS2\_43

Sum of electronic and zero-point Energies= -385.360746

|   |           |           |           |
|---|-----------|-----------|-----------|
| C | 2.439676  | 0.630081  | 0.000741  |
| C | 1.278111  | 1.385219  | 0.001334  |
| C | -0.041558 | -0.700488 | -0.002460 |
| C | 0.031715  | 0.733355  | -0.004367 |
| C | -1.213298 | 1.471559  | -0.060547 |
| C | -2.406129 | 0.728009  | -0.062830 |
| C | -1.314174 | -1.357421 | -0.010927 |
| C | 1.163545  | -1.437240 | 0.005480  |
| C | -2.512372 | -0.671863 | -0.013425 |
| C | 2.381188  | -0.778918 | 0.005196  |
| H | 3.404447  | 1.127506  | -0.000117 |
| H | 1.323025  | 2.470226  | -0.001752 |
| H | -1.228333 | 2.549111  | -0.218260 |
| H | -1.961374 | 1.330814  | 1.027562  |
| H | -1.332023 | -2.444968 | 0.004729  |
| H | 1.124524  | -2.522323 | 0.011496  |
| H | -3.473692 | -1.172480 | 0.017124  |
| H | 3.303203  | -1.351655 | 0.010046  |

TS43\_44

Sum of electronic and zero-point Energies= -385.345256

|   |           |           |           |
|---|-----------|-----------|-----------|
| C | -2.427956 | 0.620971  | -0.055627 |
| C | -1.294749 | 1.386946  | -0.012929 |
| C | 0.070783  | -0.721312 | 0.036390  |
| C | -0.007806 | 0.740018  | 0.054591  |
| C | 1.281382  | 1.495139  | -0.037591 |
| C | 2.430866  | 0.749815  | -0.078381 |
| C | 1.333096  | -1.352935 | 0.012366  |
| C | -1.144958 | -1.453319 | 0.020728  |
| C | 2.526032  | -0.629187 | -0.046884 |
| C | -2.355593 | -0.801719 | -0.029209 |
| H | -3.398905 | 1.102681  | -0.113825 |
| H | -1.342983 | 2.471678  | -0.021434 |
| H | 0.545905  | 1.130368  | 1.097611  |
| H | 1.250453  | 2.580889  | -0.074929 |
| H | 1.370595  | -2.439296 | 0.025468  |
| H | -1.101290 | -2.538060 | 0.030347  |
| H | 3.485436  | -1.137931 | -0.070837 |
| H | -3.275791 | -1.376829 | -0.053122 |

TS44\_45



Sum of electronic and zero-point Energies= -385.346344

|   |           |           |           |
|---|-----------|-----------|-----------|
| C | 0.037100  | 0.746183  | 0.054283  |
| C | 1.272596  | 1.514172  | -0.020622 |
| C | 0.105713  | -0.719479 | 0.033983  |
| C | 1.380617  | -1.353322 | 0.013199  |
| C | 2.410446  | 0.794140  | -0.059124 |
| C | 2.538722  | -0.605970 | -0.037922 |
| C | -1.299001 | 1.369206  | -0.037544 |
| C | -1.097071 | -1.448134 | 0.016126  |
| C | -2.444223 | 0.575907  | -0.063298 |
| C | -2.339164 | -0.821415 | -0.035073 |
| H | 1.243633  | 2.600524  | -0.038193 |
| H | 1.424892  | -2.438683 | 0.022846  |
| H | 3.513759  | -1.083724 | -0.063139 |
| H | -1.349760 | 2.453927  | -0.058396 |
| H | -1.045710 | -2.533234 | 0.023795  |
| H | -3.415326 | 1.056129  | -0.123638 |
| H | -3.241497 | -1.424153 | -0.056248 |
| H | -0.524399 | 1.061485  | 1.108926  |

TS45\_46

Sum of electronic and zero-point Energies= -385.360400

|   |           |           |           |
|---|-----------|-----------|-----------|
| C | 0.065771  | 0.741781  | -0.006210 |
| C | 1.262611  | 1.504923  | -0.009096 |
| C | 0.127038  | -0.696128 | 0.000150  |
| C | 1.388443  | -1.338991 | 0.010887  |
| C | 2.427349  | 0.796982  | -0.009457 |
| C | 2.557271  | -0.589497 | 0.004065  |
| C | -1.219426 | 1.365460  | -0.044469 |
| C | -1.087672 | -1.450055 | -0.008932 |
| C | -2.416645 | 0.570884  | -0.041003 |
| C | -2.324723 | -0.856093 | -0.020625 |
| H | 1.233328  | 2.591356  | -0.017981 |
| H | 1.433783  | -2.424416 | 0.021982  |
| H | 3.530761  | -1.071316 | 0.008968  |
| H | -1.307870 | 2.446141  | -0.128656 |
| H | -1.016844 | -2.534403 | -0.004434 |
| H | -3.374765 | 1.070761  | -0.161636 |
| H | -3.235289 | -1.443897 | -0.024839 |
| H | -1.943215 | 1.070181  | 1.054736  |

TS38\_46

Sum of electronic and zero-point Energies= -385.352884

|   |           |           |           |
|---|-----------|-----------|-----------|
| C | 0.052667  | 0.760168  | -0.008310 |
| C | 1.271162  | 1.511188  | 0.003565  |
| C | 0.123548  | -0.695961 | -0.008784 |
| C | 1.396073  | -1.343003 | 0.002670  |
| C | 2.423398  | 0.798894  | 0.007148  |
| C | 2.555786  | -0.598056 | 0.007587  |
| C | -1.199719 | 1.394254  | -0.028587 |
| C | -1.064227 | -1.443910 | -0.028218 |
| C | -2.389141 | 0.648515  | -0.034408 |

|   |           |           |           |
|---|-----------|-----------|-----------|
| C | -2.319151 | -0.816904 | -0.036638 |
| H | 1.245569  | 2.597477  | 0.006376  |
| H | 1.436582  | -2.428622 | 0.004562  |
| H | 3.531410  | -1.075304 | 0.011658  |
| H | -1.256668 | 2.478085  | -0.052951 |
| H | -1.018987 | -2.528349 | -0.051884 |
| H | -3.360790 | 1.126363  | -0.113046 |
| H | -3.241569 | -1.384756 | -0.105559 |
| H | -2.437917 | -0.076000 | 1.044697  |

TS41\_P4

Sum of electronic and zero-point Energies= -385.285520

|   |           |           |           |
|---|-----------|-----------|-----------|
| C | 0.028872  | -0.813133 | 0.000000  |
| C | 1.312138  | -1.451856 | 0.000000  |
| C | 0.000000  | 0.642971  | 0.000000  |
| C | 1.282023  | 1.164060  | 0.000000  |
| C | 2.384252  | -0.634805 | 0.000000  |
| C | 2.560976  | 0.751302  | 0.000000  |
| C | -1.206267 | -1.504555 | 0.000000  |
| C | -1.238610 | 1.332154  | 0.000000  |
| C | -2.394207 | -0.807146 | 0.000000  |
| C | -2.409043 | 0.610218  | 0.000000  |
| H | 1.400437  | -2.534179 | 0.000000  |
| H | 1.164966  | 2.937856  | 0.384480  |
| H | 1.164966  | 2.937856  | -0.384480 |
| H | 3.489732  | 1.310229  | 0.000000  |
| H | -1.196299 | -2.590311 | 0.000000  |
| H | -1.250439 | 2.417367  | 0.000000  |
| H | -3.334925 | -1.348395 | 0.000000  |
| H | -3.359238 | 1.134312  | 0.000000  |

TS42\_P20

Sum of electronic and zero-point Energies= -385.281939

|   |           |           |           |
|---|-----------|-----------|-----------|
| C | 2.471857  | 0.573757  | 0.035435  |
| C | 1.324336  | 1.359300  | 0.035060  |
| C | -0.044423 | -0.682963 | -0.030836 |
| C | 0.047216  | 0.758962  | 0.010620  |
| C | -1.151272 | 1.549416  | -0.047511 |
| C | -2.352678 | 0.889668  | 0.065733  |
| C | -1.325538 | -1.310611 | -0.024498 |
| C | 1.144254  | -1.454366 | -0.029620 |
| C | -2.368932 | -0.417643 | -0.098797 |
| C | 2.382207  | -0.829549 | 0.006404  |
| H | 3.446961  | 1.049666  | 0.066015  |
| H | 1.403535  | 2.441943  | 0.063884  |
| H | -1.090587 | 2.618568  | -0.241595 |
| H | -1.439085 | -2.385975 | 0.074870  |
| H | 1.077357  | -2.537658 | -0.066095 |
| H | 3.287496  | -1.428062 | 0.002834  |
| H | -3.726193 | -1.107401 | -0.103849 |
| H | -3.721651 | -1.266899 | 0.672000  |

## TS43\_P15

Sum of electronic and zero-point Energies= -385.281077

|   |           |           |           |
|---|-----------|-----------|-----------|
| C | 2.437478  | 0.617098  | -0.009092 |
| C | 1.271443  | 1.376081  | -0.060020 |
| C | -0.055910 | -0.716532 | 0.007526  |
| C | 0.025739  | 0.732636  | -0.063677 |
| C | -1.267094 | 1.297912  | -0.094330 |
| C | -2.413201 | 0.692512  | 0.026347  |
| C | -1.314756 | -1.376437 | 0.042275  |
| C | 1.163614  | -1.442258 | 0.028011  |
| C | -2.539009 | -0.684988 | -0.024250 |
| C | 2.384828  | -0.786493 | 0.033716  |
| H | 3.399091  | 1.120460  | -0.021605 |
| H | 1.322525  | 2.461001  | -0.074094 |
| H | -1.330975 | -2.463337 | 0.055689  |
| H | 1.126255  | -2.527735 | 0.018246  |
| H | -3.481092 | -1.204305 | -0.172316 |
| H | 3.305771  | -1.359635 | 0.055029  |
| H | -1.222171 | 2.897616  | 0.802718  |
| H | -1.278195 | 2.818753  | 0.017295  |

## 32

Sum of electronic and zero-point Energies= -385.389398

|   |           |           |           |
|---|-----------|-----------|-----------|
| C | 2.435143  | -0.922784 | 0.000000  |
| C | 1.134175  | -1.424633 | 0.000000  |
| C | 0.000000  | 0.677731  | 0.000000  |
| C | -0.082112 | -0.761561 | 0.000000  |
| C | -2.497365 | -0.665246 | 0.000000  |
| C | -2.414140 | 0.741718  | 0.000000  |
| C | 1.351199  | 1.332754  | 0.000000  |
| C | 2.539415  | 0.445471  | 0.000000  |
| C | -1.185124 | 1.406038  | 0.000000  |
| C | -1.343297 | -1.420509 | 0.000000  |
| H | 3.303792  | -1.574012 | 0.000000  |
| H | -3.468806 | -1.148139 | 0.000000  |
| H | -3.329316 | 1.326633  | 0.000000  |
| H | 1.439851  | 2.017441  | 0.863000  |
| H | 3.518985  | 0.919411  | 0.000000  |
| H | -1.158251 | 2.492287  | 0.000000  |
| H | -1.373468 | -2.504936 | 0.000000  |
| H | 1.439851  | 2.017441  | -0.863000 |

## 33

Sum of electronic and zero-point Energies= -385.382044

|   |           |           |          |
|---|-----------|-----------|----------|
| C | 2.386147  | -0.963623 | 0.000000 |
| C | 1.156399  | -1.483831 | 0.000000 |
| C | 0.000000  | 0.680665  | 0.000000 |
| C | -0.074660 | -0.781535 | 0.000000 |
| C | -2.482551 | -0.608741 | 0.000000 |
| C | -2.429149 | 0.809837  | 0.000000 |
| C | 1.239989  | 1.283869  | 0.000000 |
| C | 2.507562  | 0.529885  | 0.000000 |

|   |           |           |           |
|---|-----------|-----------|-----------|
| C | -1.214519 | 1.446930  | 0.000000  |
| C | -1.334703 | -1.393628 | 0.000000  |
| H | 3.293280  | -1.562144 | 0.000000  |
| H | -3.453515 | -1.096149 | 0.000000  |
| H | -3.351745 | 1.380434  | 0.000000  |
| H | 1.306147  | 2.370231  | 0.000000  |
| H | 3.116946  | 0.866567  | 0.860959  |
| H | -1.150501 | 2.531415  | 0.000000  |
| H | -1.404652 | -2.475895 | 0.000000  |
| H | 3.116946  | 0.866567  | -0.860959 |

34

Sum of electronic and zero-point Energies= -385.384481

|   |           |           |           |
|---|-----------|-----------|-----------|
| C | 2.446751  | 0.663355  | 0.000000  |
| C | 1.287497  | 1.359485  | 0.000000  |
| C | -0.074267 | -0.756852 | 0.000000  |
| C | 0.000000  | 0.705764  | 0.000000  |
| C | -1.206189 | 1.415941  | 0.000000  |
| C | -2.421597 | 0.738108  | 0.000000  |
| C | -1.346445 | -1.422647 | 0.000000  |
| C | 1.121846  | -1.402467 | 0.000000  |
| C | -2.498755 | -0.678056 | 0.000000  |
| C | 2.458584  | -0.839364 | 0.000000  |
| H | 3.409950  | 1.165611  | 0.000000  |
| H | 1.302278  | 2.445449  | 0.000000  |
| H | -1.189704 | 2.501639  | 0.000000  |
| H | -3.343618 | 1.312821  | 0.000000  |
| H | -1.368066 | -2.507389 | 0.000000  |
| H | -3.469184 | -1.162756 | 0.000000  |
| H | 3.026891  | -1.227489 | 0.865673  |
| H | 3.026891  | -1.227489 | -0.865673 |

35

Sum of electronic and zero-point Energies= -385.381682

|   |           |           |           |
|---|-----------|-----------|-----------|
| C | 2.574576  | -0.578456 | 0.000000  |
| C | 1.424228  | -1.290600 | 0.000000  |
| C | 0.000000  | 0.708877  | 0.000000  |
| C | 0.113286  | -0.751369 | 0.000000  |
| C | -2.369100 | -0.924933 | 0.000000  |
| C | -2.428729 | 0.558545  | 0.000000  |
| C | 1.182991  | 1.462085  | 0.000000  |
| C | 2.429142  | 0.841887  | 0.000000  |
| C | -1.304159 | 1.314543  | 0.000000  |
| C | -1.025459 | -1.524752 | 0.000000  |
| H | 3.559032  | -1.036084 | 0.000000  |
| H | -2.937197 | -1.336489 | 0.857159  |
| H | -3.410210 | 1.022883  | 0.000000  |
| H | 1.124367  | 2.545960  | 0.000000  |
| H | 3.326891  | 1.455199  | 0.000000  |
| H | -1.365548 | 2.398935  | 0.000000  |
| H | -0.940781 | -2.608878 | 0.000000  |
| H | -2.937197 | -1.336489 | -0.857159 |

36

Sum of electronic and zero-point Energies= -385.380892

|   |           |           |           |
|---|-----------|-----------|-----------|
| C | 2.557589  | -0.497026 | 0.000000  |
| C | 1.417192  | -1.254162 | 0.000000  |
| C | 0.000000  | 0.684086  | 0.000000  |
| C | 0.118778  | -0.775730 | 0.000000  |
| C | -2.290638 | -1.055626 | 0.000000  |
| C | -2.482167 | 0.416146  | 0.000000  |
| C | 1.185852  | 1.498615  | 0.000000  |
| C | 2.432941  | 0.926076  | 0.000000  |
| C | -1.260853 | 1.237825  | 0.000000  |
| C | -1.053332 | -1.608215 | 0.000000  |
| H | 3.543355  | -0.956211 | 0.000000  |
| H | -3.178945 | -1.679908 | 0.000000  |
| H | -3.112234 | 0.725034  | 0.858000  |
| H | 1.073015  | 2.578784  | 0.000000  |
| H | 3.328146  | 1.539625  | 0.000000  |
| H | -1.376753 | 2.320163  | 0.000000  |
| H | -0.916522 | -2.684453 | 0.000000  |
| H | -3.112234 | 0.725034  | -0.858000 |

37

Sum of electronic and zero-point Energies= -385.386459

|   |           |           |           |
|---|-----------|-----------|-----------|
| C | 2.573958  | -0.559918 | 0.000000  |
| C | 1.421977  | -1.284409 | 0.000000  |
| C | 0.000000  | 0.682797  | 0.000000  |
| C | 0.121719  | -0.753081 | 0.000000  |
| C | -2.341209 | -1.018336 | 0.000000  |
| C | -2.510714 | 0.339494  | 0.000000  |
| C | 1.158508  | 1.453600  | 0.000000  |
| C | 2.420451  | 0.848415  | 0.000000  |
| C | -1.372148 | 1.284514  | 0.000000  |
| C | -1.033369 | -1.554813 | 0.000000  |
| H | 3.559669  | -1.014790 | 0.000000  |
| H | -3.194454 | -1.688060 | 0.000000  |
| H | -3.510873 | 0.765992  | 0.000000  |
| H | 1.089146  | 2.537592  | 0.000000  |
| H | 3.309572  | 1.473611  | 0.000000  |
| H | -1.491683 | 1.965421  | 0.863000  |
| H | -0.904735 | -2.634764 | 0.000000  |
| H | -1.491683 | 1.965421  | -0.863000 |

38

Sum of electronic and zero-point Energies= -385.383185

|   |           |           |          |
|---|-----------|-----------|----------|
| C | 0.204293  | -0.746607 | 0.000000 |
| C | 1.527478  | -1.229339 | 0.000000 |
| C | 0.000000  | 0.698821  | 0.000000 |
| C | 1.126377  | 1.597615  | 0.000000 |
| C | 2.525522  | -0.291101 | 0.000000 |
| C | 2.410105  | 1.103081  | 0.000000 |
| C | -0.927330 | -1.635015 | 0.000000 |

|   |           |           |           |
|---|-----------|-----------|-----------|
| C | -1.287529 | 1.185245  | 0.000000  |
| C | -2.193532 | -1.154699 | 0.000000  |
| C | -2.466705 | 0.303804  | 0.000000  |
| H | 1.732944  | -2.296218 | 0.000000  |
| H | 0.941933  | 2.668843  | 0.000000  |
| H | 3.279082  | 1.753470  | 0.000000  |
| H | -0.738700 | -2.704323 | 0.000000  |
| H | -1.459113 | 2.259865  | 0.000000  |
| H | -3.044715 | -1.828930 | 0.000000  |
| H | -3.111756 | 0.578235  | 0.858000  |
| H | -3.111756 | 0.578235  | -0.858000 |

39

Sum of electronic and zero-point Energies= -385.385760

|   |           |           |           |
|---|-----------|-----------|-----------|
| C | 0.207950  | -0.725266 | 0.000000  |
| C | 1.537608  | -1.255834 | 0.000000  |
| C | 0.000000  | 0.694621  | 0.000000  |
| C | 1.099052  | 1.553334  | 0.000000  |
| C | 2.551561  | -0.349057 | 0.000000  |
| C | 2.400746  | 1.031806  | 0.000000  |
| C | -0.908624 | -1.582430 | 0.000000  |
| C | -1.402429 | 1.221138  | 0.000000  |
| C | -2.245100 | -1.124419 | 0.000000  |
| C | -2.490743 | 0.221838  | 0.000000  |
| H | 1.701480  | -2.330248 | 0.000000  |
| H | 0.952643  | 2.630310  | 0.000000  |
| H | 3.259816  | 1.697472  | 0.000000  |
| H | -0.728724 | -2.655885 | 0.000000  |
| H | -1.557496 | 1.896133  | 0.862000  |
| H | -3.058125 | -1.842562 | 0.000000  |
| H | -3.512211 | 0.594267  | 0.000000  |
| H | -1.557496 | 1.896133  | -0.862000 |

40

Sum of electronic and zero-point Energies= -385.355524

|   |           |           |           |
|---|-----------|-----------|-----------|
| C | 0.011578  | 0.797118  | 0.083901  |
| C | 1.223070  | 1.531744  | 0.020433  |
| C | 0.090785  | -0.691997 | 0.241644  |
| C | 1.411609  | -1.338838 | -0.018777 |
| C | 2.373048  | 0.813221  | -0.094163 |
| C | 2.540814  | -0.585501 | -0.143249 |
| C | -1.261488 | 1.403735  | 0.029794  |
| C | -1.167413 | -1.449318 | -0.016010 |
| C | -2.400062 | 0.632111  | -0.082985 |
| C | -2.353550 | -0.797343 | -0.127315 |
| H | 1.207755  | 2.618393  | -0.000085 |
| H | 1.454076  | -2.425295 | -0.014685 |
| H | 3.517843  | -1.037673 | -0.284360 |
| H | -1.329447 | 2.487222  | 0.013613  |
| H | -1.113808 | -2.534414 | -0.018673 |
| H | -3.365502 | 1.124052  | -0.162228 |
| H | -3.274509 | -1.354855 | -0.263252 |

|   |          |           |          |
|---|----------|-----------|----------|
| H | 0.093250 | -0.767022 | 1.370030 |
|---|----------|-----------|----------|

41

Sum of electronic and zero-point Energies= -385.355524

|   |           |           |           |
|---|-----------|-----------|-----------|
| C | 0.013245  | -0.751270 | 0.000000  |
| C | 1.256016  | -1.421056 | 0.000000  |
| C | 0.000000  | 0.686511  | 0.000000  |
| C | 1.290680  | 1.454007  | 0.000000  |
| C | 2.446181  | -0.696230 | 0.000000  |
| C | 2.546671  | 0.647215  | 0.000000  |
| C | -1.208460 | -1.482265 | 0.000000  |
| C | -1.229172 | 1.338921  | 0.000000  |
| C | -2.410366 | -0.807007 | 0.000000  |
| C | -2.416227 | 0.602210  | 0.000000  |
| H | 1.274533  | -2.510283 | 0.000000  |
| H | 1.326915  | 2.140006  | 0.866000  |
| H | 3.500963  | 1.169905  | 0.000000  |
| H | -1.176799 | -2.567853 | 0.000000  |
| H | -1.270089 | 2.424475  | 0.000000  |
| H | -3.348255 | -1.352290 | 0.000000  |
| H | -3.365586 | 1.129826  | 0.000000  |
| H | 1.326915  | 2.140006  | -0.866000 |

42

Sum of electronic and zero-point Energies= -385.381904

|   |           |           |           |
|---|-----------|-----------|-----------|
| C | 2.436703  | 0.676284  | 0.000000  |
| C | 1.262681  | 1.381775  | 0.000000  |
| C | -0.018730 | -0.770926 | 0.000000  |
| C | 0.000000  | 0.690084  | 0.000000  |
| C | -1.184003 | 1.391768  | 0.000000  |
| C | -2.401416 | -0.739155 | 0.000000  |
| C | 1.205476  | -1.452166 | 0.000000  |
| C | 2.400893  | -0.743223 | 0.000000  |
| C | -1.284523 | -1.473038 | 0.000000  |
| C | -2.509232 | 0.719860  | 0.000000  |
| H | 3.392180  | 1.189743  | 0.000000  |
| H | 1.262074  | 2.467866  | 0.000000  |
| H | -1.172853 | 2.480404  | 0.000000  |
| H | 1.216125  | -2.537521 | 0.000000  |
| H | 3.338751  | -1.291916 | 0.000000  |
| H | -1.290102 | -2.560150 | 0.000000  |
| H | -3.096632 | 1.082000  | 0.864600  |
| H | -3.096632 | 1.082000  | -0.864600 |

43

Sum of electronic and zero-point Energies= -385.388550

|   |           |           |          |
|---|-----------|-----------|----------|
| C | 2.398813  | -0.721316 | 0.000000 |
| C | 1.191019  | -1.427696 | 0.000000 |
| C | 0.000000  | 0.696874  | 0.000000 |
| C | -0.014082 | -0.737492 | 0.000000 |
| C | -1.345807 | -1.460678 | 0.000000 |
| C | -2.485280 | -0.554939 | 0.000000 |

|   |           |           |           |
|---|-----------|-----------|-----------|
| C | -1.213950 | 1.413896  | 0.000000  |
| C | 1.242291  | 1.391497  | 0.000000  |
| C | -2.492517 | 0.795684  | 0.000000  |
| C | 2.428276  | 0.685176  | 0.000000  |
| H | 3.333723  | -1.274240 | 0.000000  |
| H | 1.201063  | -2.513905 | 0.000000  |
| H | -1.419579 | -2.137622 | 0.869000  |
| H | -1.419579 | -2.137622 | -0.869000 |
| H | -1.168619 | 2.502160  | 0.000000  |
| H | 1.242237  | 2.477618  | 0.000000  |
| H | -3.401014 | 1.390340  | 0.000000  |
| H | 3.379189  | 1.207235  | 0.000000  |

44

Sum of electronic and zero-point Energies= -385.354430

|   |           |           |           |
|---|-----------|-----------|-----------|
| C | -2.426515 | 0.614377  | -0.129596 |
| C | -1.309281 | 1.382958  | -0.022367 |
| C | 0.090077  | -0.732879 | 0.091579  |
| C | 0.014370  | 0.755948  | 0.230760  |
| C | 1.285690  | 1.516540  | -0.042295 |
| C | 2.405764  | 0.791509  | -0.142508 |
| C | 1.357483  | -1.362800 | 0.033614  |
| C | -1.116352 | -1.461059 | 0.040878  |
| C | 2.513103  | -0.613031 | -0.103759 |
| C | -2.329414 | -0.809617 | -0.077975 |
| H | -3.398668 | 1.077543  | -0.264222 |
| H | -1.363842 | 2.467986  | -0.026101 |
| H | 0.026161  | 0.852389  | 1.357358  |
| H | 1.256313  | 2.603257  | -0.049198 |
| H | 1.408041  | -2.448029 | 0.030126  |
| H | -1.077600 | -2.546163 | 0.033225  |
| H | 3.479764  | -1.101117 | -0.197261 |
| H | -3.239721 | -1.397541 | -0.153920 |

45

Sum of electronic and zero-point Energies= -385.387739

|   |           |           |          |
|---|-----------|-----------|----------|
| C | 0.205446  | -0.718561 | 0.000000 |
| C | 1.513332  | -1.211438 | 0.000000 |
| C | 0.000000  | 0.703446  | 0.000000 |
| C | 1.108953  | 1.602032  | 0.000000 |
| C | 2.523110  | -0.275108 | 0.000000 |
| C | 2.402528  | 1.108710  | 0.000000 |
| C | -0.983702 | -1.630372 | 0.000000 |
| C | -1.315490 | 1.198870  | 0.000000 |
| C | -2.314201 | -0.984300 | 0.000000 |
| C | -2.464889 | 0.374306  | 0.000000 |
| H | 1.718128  | -2.279046 | 0.000000 |
| H | 0.924678  | 2.673239  | 0.000000 |
| H | 3.266270  | 1.766180  | 0.000000 |
| H | -0.934577 | -2.319259 | 0.862000 |
| H | -1.455137 | 2.278272  | 0.000000 |
| H | -3.185583 | -1.634547 | 0.000000 |



|   |           |           |           |
|---|-----------|-----------|-----------|
| H | -3.449717 | 0.828914  | 0.000000  |
| H | -0.934577 | -2.319259 | -0.862000 |

46

Sum of electronic and zero-point Energies= -385.380709

|   |           |           |           |
|---|-----------|-----------|-----------|
| C | 0.197448  | -0.725786 | 0.000000  |
| C | 1.538645  | -1.266036 | 0.000000  |
| C | 0.000000  | 0.719141  | 0.000000  |
| C | 1.126723  | 1.560999  | 0.000000  |
| C | 2.552309  | -0.371395 | 0.000000  |
| C | 2.411815  | 1.020741  | 0.000000  |
| C | -0.905342 | -1.551242 | 0.000000  |
| C | -1.333279 | 1.258376  | 0.000000  |
| C | -2.279904 | -1.027078 | 0.000000  |
| C | -2.420203 | 0.448879  | 0.000000  |
| H | 1.691159  | -2.342206 | 0.000000  |
| H | 0.992671  | 2.638728  | 0.000000  |
| H | 3.281921  | 1.672468  | 0.000000  |
| H | -0.772783 | -2.631304 | 0.000000  |
| H | -1.448331 | 2.338078  | 0.000000  |
| H | -2.824958 | -1.468964 | 0.857000  |
| H | -3.423990 | 0.862566  | 0.000000  |
| H | -2.824958 | -1.468964 | -0.857000 |

### C4H2 Elimination

TS2\_47

Sum of electronic and zero-point Energies= -385.344795

|   |           |           |           |
|---|-----------|-----------|-----------|
| C | -2.481695 | -0.780760 | -0.058843 |
| C | -1.256886 | -1.407533 | -0.041257 |
| C | -0.021618 | 0.719674  | 0.030402  |
| C | 0.031383  | -0.756803 | 0.051034  |
| C | 2.452148  | -0.684593 | -0.055927 |
| C | 2.405949  | 0.742624  | -0.024314 |
| C | -1.279704 | 1.346523  | 0.005859  |
| C | -2.473787 | 0.629031  | -0.038666 |
| C | 1.211870  | 1.421694  | 0.021104  |
| C | 1.310354  | -1.432572 | -0.020413 |
| H | -3.408067 | -1.344787 | -0.109894 |
| H | -0.520571 | -1.138069 | 1.108994  |
| H | 3.415482  | -1.181058 | -0.114977 |
| H | 3.338523  | 1.297765  | -0.040965 |
| H | -1.314543 | 2.432266  | 0.006568  |
| H | -3.421164 | 1.159813  | -0.060902 |
| H | 1.191814  | 2.507382  | 0.035360  |
| H | 1.330445  | -2.517023 | -0.038067 |

TS47\_48

Sum of electronic and zero-point Energies= -385.293581

|   |           |           |          |
|---|-----------|-----------|----------|
| C | -0.124917 | -0.610814 | 0.209935 |
| C | -0.245122 | 0.788771  | 0.482623 |
| C | -1.453464 | 1.436268  | 0.297366 |

|   |           |           |           |
|---|-----------|-----------|-----------|
| C | -2.578582 | 0.706454  | -0.127376 |
| C | -2.500467 | -0.683395 | -0.338208 |
| C | -1.300177 | -1.341063 | -0.149104 |
| C | 1.108085  | -1.314375 | 0.240182  |
| C | 2.406010  | -0.812776 | 0.114431  |
| C | 2.777850  | 0.515756  | -0.234063 |
| C | 2.077268  | 1.611767  | -0.563050 |
| H | 0.572402  | 1.327883  | 0.954514  |
| H | -1.543209 | 2.494919  | 0.517016  |
| H | -3.527764 | 1.216731  | -0.262164 |
| H | -3.382330 | -1.234652 | -0.647770 |
| H | -1.224854 | -2.410175 | -0.324867 |
| H | 1.039095  | -2.399017 | 0.299715  |
| H | 3.218735  | -1.525333 | 0.221873  |
| H | 3.849017  | 0.750081  | -0.354723 |

TS48\_49

Sum of electronic and zero-point Energies= -385.292081

|   |           |           |           |
|---|-----------|-----------|-----------|
| C | -0.253836 | -0.556307 | -0.000713 |
| C | -0.276837 | 0.876681  | -0.001944 |
| C | -1.479590 | 1.548586  | -0.001292 |
| C | -2.694876 | 0.829301  | 0.000551  |
| C | -2.702928 | -0.578366 | 0.001571  |
| C | -1.505715 | -1.261406 | 0.000831  |
| C | 0.918899  | -1.352934 | -0.000994 |
| C | 2.273864  | -1.003861 | -0.000893 |
| C | 2.826001  | 0.279342  | 0.000791  |
| C | 3.199130  | 1.511750  | 0.002650  |
| H | 0.643812  | 1.444802  | -0.003873 |
| H | -1.496503 | 2.633437  | -0.002312 |
| H | -3.636043 | 1.371632  | 0.001051  |
| H | -3.644278 | -1.117562 | 0.002895  |
| H | -1.495519 | -2.347452 | 0.001616  |
| H | 0.749191  | -2.426916 | -0.001209 |
| H | 2.987059  | -1.824507 | -0.002211 |
| H | 4.067605  | 0.509852  | 0.000696  |

TS44\_49

Sum of electronic and zero-point Energies= -385.360746

|   |           |           |           |
|---|-----------|-----------|-----------|
| C | 2.439676  | 0.630081  | 0.000741  |
| C | 1.278111  | 1.385219  | 0.001334  |
| C | -0.041558 | -0.700488 | -0.002460 |
| C | 0.031715  | 0.733355  | -0.004367 |
| C | -1.213298 | 1.471559  | -0.060547 |
| C | -2.406129 | 0.728009  | -0.062830 |
| C | -1.314174 | -1.357421 | -0.010927 |
| C | 1.163545  | -1.437240 | 0.005480  |
| C | -2.512372 | -0.671863 | -0.013425 |
| C | 2.381188  | -0.778918 | 0.005196  |
| H | 3.404447  | 1.127506  | -0.000117 |
| H | 1.323025  | 2.470226  | -0.001752 |
| H | -1.228333 | 2.549111  | -0.218260 |

|   |           |           |          |
|---|-----------|-----------|----------|
| H | -1.961374 | 1.330814  | 1.027562 |
| H | -1.332023 | -2.444968 | 0.004729 |
| H | 1.124524  | -2.522323 | 0.011496 |
| H | -3.473692 | -1.172480 | 0.017124 |
| H | 3.303203  | -1.351655 | 0.010046 |

TS49\_50

Sum of electronic and zero-point Energies= -385.289778

|   |           |           |           |
|---|-----------|-----------|-----------|
| C | 2.856890  | 0.829248  | 0.008803  |
| C | 1.667186  | 1.571712  | -0.002177 |
| C | 0.404117  | -0.486847 | -0.015410 |
| C | 0.441690  | 0.920982  | -0.011974 |
| C | -4.153911 | 0.834824  | 0.016007  |
| C | -3.148927 | 0.112954  | -0.014192 |
| C | -0.857239 | -1.241573 | -0.043928 |
| C | 1.600942  | -1.229863 | 0.001393  |
| C | -2.145751 | -0.738718 | -0.092904 |
| C | 2.823911  | -0.568088 | 0.008682  |
| H | 3.812023  | 1.345593  | 0.016074  |
| H | 1.703730  | 2.656297  | -0.007472 |
| H | -0.479451 | 1.496194  | -0.028418 |
| H | -5.018432 | 1.468788  | 0.044733  |
| H | -0.770758 | -2.318483 | -0.220970 |
| H | 1.567953  | -2.316167 | 0.002057  |
| H | -1.495905 | -1.222206 | 1.053891  |
| H | 3.747396  | -1.137800 | 0.014298  |

TS50\_51

Sum of electronic and zero-point Energies= -385.273550

|   |           |           |           |
|---|-----------|-----------|-----------|
| C | 2.965843  | 0.707009  | -0.101658 |
| C | 1.842669  | 1.541731  | 0.017271  |
| C | 0.430326  | -0.421109 | 0.097067  |
| C | 0.576928  | 0.993936  | 0.124462  |
| C | -4.461779 | 0.602920  | -0.090801 |
| C | -3.332513 | 0.087441  | -0.053267 |
| C | -0.975813 | -1.092794 | 0.005183  |
| C | 1.574536  | -1.261945 | 0.004793  |
| C | -2.136882 | -0.434537 | -0.013849 |
| C | 2.830142  | -0.688245 | -0.105855 |
| H | 3.954196  | 1.148921  | -0.183958 |
| H | 1.965266  | 2.619822  | 0.022617  |
| H | -0.300843 | 1.626351  | 0.214921  |
| H | -5.444228 | 1.027807  | -0.124441 |
| H | -0.928534 | -2.173689 | -0.133350 |
| H | -0.288050 | -0.792473 | 1.085294  |
| H | 1.454609  | -2.341557 | 0.010579  |
| H | 3.706837  | -1.321618 | -0.191731 |

47

Sum of electronic and zero-point Energies= -385.354921

|   |           |           |           |
|---|-----------|-----------|-----------|
| C | -2.461511 | -0.822691 | -0.133935 |
| C | -1.267904 | -1.425922 | -0.024432 |

|   |           |           |           |
|---|-----------|-----------|-----------|
| C | -0.037773 | 0.730382  | 0.091491  |
| C | 0.013669  | -0.768460 | 0.251402  |
| C | 2.448715  | -0.681283 | -0.135361 |
| C | 2.381027  | 0.747466  | -0.084959 |
| C | -1.301437 | 1.355179  | 0.032321  |
| C | -2.464045 | 0.615836  | -0.087379 |
| C | 1.185973  | 1.429396  | 0.032229  |
| C | 1.321135  | -1.430384 | -0.024058 |
| H | -3.389573 | -1.370129 | -0.271255 |
| H | 3.411150  | -1.161432 | -0.279459 |
| H | 3.304725  | 1.313477  | -0.165851 |
| H | -1.349225 | 2.439877  | 0.019729  |
| H | -3.417429 | 1.131940  | -0.167513 |
| H | 1.172395  | 2.515307  | 0.016861  |
| H | 0.016334  | -0.850602 | 1.377491  |
| H | 1.344517  | -2.515551 | -0.033920 |

48

Sum of electronic and zero-point Energies= -385.294134

|   |           |           |          |
|---|-----------|-----------|----------|
| C | 0.000000  | 0.580707  | 0.000000 |
| C | -0.520484 | -0.748065 | 0.000000 |
| C | -1.879739 | -0.972318 | 0.000000 |
| C | -2.773861 | 0.121733  | 0.000000 |
| C | -2.296016 | 1.443080  | 0.000000 |
| C | -0.935177 | 1.671562  | 0.000000 |
| C | 1.375047  | 0.927116  | 0.000000 |
| C | 2.544652  | 0.155900  | 0.000000 |
| C | 2.710702  | -1.256972 | 0.000000 |
| C | 1.898228  | -2.313890 | 0.000000 |
| H | 0.135215  | -1.624013 | 0.000000 |
| H | -2.265913 | -1.986241 | 0.000000 |
| H | -3.843917 | -0.065002 | 0.000000 |
| H | -2.992627 | 2.274711  | 0.000000 |
| H | -0.551478 | 2.687775  | 0.000000 |
| H | 1.569329  | 1.997537  | 0.000000 |
| H | 3.470208  | 0.724162  | 0.000000 |
| H | 3.739083  | -1.662044 | 0.000000 |

49

Sum of electronic and zero-point Energies= -385.373134

|   |           |           |          |
|---|-----------|-----------|----------|
| C | -2.798939 | 0.454704  | 0.000000 |
| C | -2.020723 | -0.722334 | 0.000000 |
| C | 0.000000  | 0.636509  | 0.000000 |
| C | -0.644816 | -0.642309 | 0.000000 |
| C | 2.494975  | -2.696458 | 0.000000 |
| C | 2.416423  | -1.477438 | 0.000000 |
| C | 1.404820  | 0.830061  | 0.000000 |
| C | -0.815636 | 1.816855  | 0.000000 |
| C | 2.460692  | -0.089381 | 0.000000 |
| C | -2.191586 | 1.724279  | 0.000000 |
| H | -3.882516 | 0.378608  | 0.000000 |
| H | -2.510746 | -1.690411 | 0.000000 |

|   |           |           |          |
|---|-----------|-----------|----------|
| H | -0.048921 | -1.545774 | 0.000000 |
| H | 2.555058  | -3.765824 | 0.000000 |
| H | 1.728275  | 1.868483  | 0.000000 |
| H | -0.332002 | 2.789356  | 0.000000 |
| H | 3.463025  | 0.338479  | 0.000000 |
| H | -2.803435 | 2.620156  | 0.000000 |

50

Sum of electronic and zero-point Energies= -385.300252

|   |           |           |           |
|---|-----------|-----------|-----------|
| C | 2.954602  | 0.753046  | -0.000037 |
| C | 1.796461  | 1.550209  | 0.000034  |
| C | 0.428598  | -0.435453 | 0.000039  |
| C | 0.536665  | 0.958744  | 0.000071  |
| C | -4.409974 | 0.669261  | -0.000213 |
| C | -3.283524 | 0.109255  | 0.000120  |
| C | -0.900063 | -1.158596 | 0.000061  |
| C | 1.589790  | -1.235428 | -0.000060 |
| C | -2.130754 | -0.449063 | 0.000098  |
| C | 2.848055  | -0.638748 | -0.000073 |
| H | 3.932726  | 1.223841  | -0.000079 |
| H | 1.884647  | 2.632136  | 0.000048  |
| H | -0.353547 | 1.581228  | 0.000161  |
| H | -5.384728 | 1.118965  | -0.000197 |
| H | -0.950779 | -1.859467 | -0.861031 |
| H | 1.503640  | -2.319284 | -0.000108 |
| H | -0.950823 | -1.859549 | 0.861092  |
| H | 3.739731  | -1.257234 | -0.000122 |

51

Sum of electronic and zero-point Energies= -385.293726

|   |           |           |           |
|---|-----------|-----------|-----------|
| C | -2.032725 | -1.227399 | -0.509691 |
| C | -1.340607 | -1.421298 | 0.711870  |
| C | -0.682207 | 0.966365  | 0.673945  |
| C | -0.703128 | -0.365445 | 1.303220  |
| C | 3.660893  | -1.014859 | -0.498054 |
| C | 2.760304  | -0.206358 | -0.272893 |
| C | 0.808674  | 1.457221  | 0.236747  |
| C | -1.505677 | 1.116745  | -0.537384 |
| C | 1.807712  | 0.683107  | -0.035279 |
| C | -2.123739 | 0.035725  | -1.122700 |
| H | -2.521078 | -2.078094 | -0.977863 |
| H | -1.332895 | -2.403607 | 1.172945  |
| H | -0.164237 | -0.490487 | 2.238420  |
| H | 4.457330  | -1.701624 | -0.695920 |
| H | 0.857725  | 2.541731  | 0.171787  |
| H | -0.931898 | 1.734057  | 1.422000  |
| H | -1.573153 | 2.103143  | -0.988374 |
| H | -2.688804 | 0.152062  | -2.041691 |

**C3H3 elimination**

TS25\_52

Sum of electronic and zero-point Energies= -385.276661

|   |           |           |           |
|---|-----------|-----------|-----------|
| C | -3.082525 | 0.000009  | 0.186832  |
| C | -3.441333 | 0.000679  | 1.385073  |
| C | 0.993376  | -1.236498 | -0.201048 |
| C | 0.993073  | 1.236272  | -0.201825 |
| C | 2.302339  | 1.219172  | 0.241557  |
| C | 2.962543  | 0.000344  | 0.466182  |
| C | 0.304276  | -0.000269 | -0.426004 |
| C | -0.983547 | -0.000585 | -0.902485 |
| C | 2.302625  | -1.218786 | 0.242366  |
| C | -2.289526 | -0.000542 | -1.036489 |
| H | -4.277381 | 0.001500  | 0.218301  |
| H | -3.861360 | -0.000039 | 2.375773  |
| H | 0.479418  | -2.173791 | -0.385998 |
| H | 0.478873  | 2.173317  | -0.387361 |
| H | 2.822116  | 2.156533  | 0.413163  |
| H | 3.991941  | 0.000577  | 0.810585  |
| H | 2.822627  | -2.155908 | 0.414600  |
| H | -2.824042 | -0.000967 | -1.984018 |

TS25\_53

Sum of electronic and zero-point Energies= -385.245941

|   |           |           |           |
|---|-----------|-----------|-----------|
| C | -3.063918 | 0.129721  | 0.195675  |
| C | -3.750374 | 0.791642  | 0.964101  |
| C | 1.333736  | -1.273548 | 0.291680  |
| C | 0.695678  | 0.963141  | -0.546843 |
| C | 1.977352  | 1.409814  | -0.289365 |
| C | 2.925368  | 0.537658  | 0.272723  |
| C | 0.344846  | -0.394817 | -0.253547 |
| C | -0.917953 | -0.884501 | -0.515632 |
| C | 2.602084  | -0.795627 | 0.566985  |
| C | -2.258340 | -0.760724 | -0.657663 |
| H | -2.698006 | 0.506045  | -0.959079 |
| H | -4.349844 | 1.396951  | 1.613427  |
| H | 1.067492  | -2.305710 | 0.493172  |
| H | -0.043222 | 1.626069  | -0.985737 |
| H | 2.252069  | 2.434360  | -0.518669 |
| H | 3.928714  | 0.901133  | 0.474764  |
| H | 3.350251  | -1.454562 | 0.995129  |
| H | -2.838330 | -1.440835 | -1.281693 |

52

Sum of electronic and zero-point Energies= -385.337323

|   |           |           |           |
|---|-----------|-----------|-----------|
| C | -2.904569 | 0.055289  | 0.067797  |
| C | -3.547377 | 0.986424  | 0.694197  |
| C | 1.448097  | -1.270594 | 0.298612  |
| C | 0.531713  | 0.887930  | -0.500724 |
| C | 1.774950  | 1.462971  | -0.329157 |
| C | 2.841757  | 0.689979  | 0.163948  |
| C | 0.342161  | -0.497980 | -0.181373 |
| C | -0.880623 | -1.110793 | -0.358128 |
| C | 2.679041  | -0.668430 | 0.479907  |

|   |           |           |           |
|---|-----------|-----------|-----------|
| C | -2.248768 | -0.966236 | -0.520562 |
| H | -3.821847 | 1.917830  | 0.198354  |
| H | -3.848958 | 0.865524  | 1.735474  |
| H | 1.298105  | -2.321595 | 0.522445  |
| H | -0.301763 | 1.463116  | -0.889476 |
| H | 1.932152  | 2.507875  | -0.576248 |
| H | 3.815584  | 1.153279  | 0.295092  |
| H | 3.519353  | -1.243789 | 0.853879  |
| H | -2.810918 | -1.753603 | -1.026622 |

53

Sum of electronic and zero-point Energies= -385.303817

|   |           |           |           |
|---|-----------|-----------|-----------|
| C | -2.394982 | -1.625863 | 0.000000  |
| C | -2.269431 | -2.825877 | 0.000000  |
| C | 0.691261  | 1.893322  | 0.000000  |
| C | 0.759876  | -0.598028 | 0.000000  |
| C | 2.136935  | -0.539347 | 0.000000  |
| C | 2.786367  | 0.710179  | 0.000000  |
| C | 0.000000  | 0.629128  | 0.000000  |
| C | -1.365805 | 0.637564  | 0.000000  |
| C | 2.069645  | 1.920938  | 0.000000  |
| C | -2.578018 | -0.173849 | 0.000000  |
| H | -3.181417 | 0.151783  | 0.867727  |
| H | -2.186856 | -3.891990 | 0.000000  |
| H | 0.108842  | 2.808860  | 0.000000  |
| H | 0.229308  | -1.543072 | 0.000000  |
| H | 2.722723  | -1.452766 | 0.000000  |
| H | 3.872688  | 0.739702  | 0.000000  |
| H | 2.601040  | 2.866689  | 0.000000  |
| H | -3.181417 | 0.151783  | -0.867727 |
